# Supplementary material for: Application of the LM-BP neural network approach for landslide risk assessments
Source: Copernicus journal article supplement (doi:10.5194/nhess-2018-360), 2018-12-06
Supplement: Supplementary file [file revised2 Application of the LM-BP neural network approach .pdf › manuscript/revised2 Application of the LM-BP neural network approach .pdf]

1    **Application of the LM-BP neural network approach for**  
2    **landslide risk assessments**

3    Junnan Xiong<sup>1,3,\*</sup>, Ming Sun<sup>2</sup>, Hao Zhang<sup>1</sup>, Weiming Cheng<sup>3</sup>, Yinghui Yang<sup>1</sup>,  
4    Mingyuan Sun<sup>1</sup>, Yifan Cao<sup>1</sup> and Jiyan Wang<sup>1</sup>

5    <sup>1</sup>School of Civil Engineering and Architecture, Southwest Petroleum University, Chengdu, 610500,  
6    P.R. China

7    <sup>2</sup>Geodetic Third Team, National Administration of Surveying, Mapping and Geo-information of China,  
8    Chengdu, 610100, P.R. China

9    <sup>3</sup>State Key Laboratory of Resources and Environmental Information System, Institute of Geographic  
10    Science and Natural Resources Research, Chinese Academy of Sciences, Beijing 100101, P.R. China

11    *Correspondence to:* Junnan Xiong (neu\_xjn@163.com)

12    Running Title: Landslide risk zonation in pipeline areas

13

**Abstract.** Landslide disaster is one of the main risks involved with the operation of long-distance oil and gas pipelines. Because previously established disaster risk models are too subjective, this paper presents a quantitative model for regional risk assessment through an analysis of the laws of historical landslide disasters along oil and gas pipelines. Using the Guangyuan section of the Lanzhou-Chengdu-Chongqing (LCC) Long-Distance Products Oil Pipeline (82km) in China as a case study, we successively carried out two independent assessments: a susceptibility assessment and a vulnerability assessment. We used an entropy weight method to establish a system for the vulnerability assessment, whereas a Levenberg Marquardt- Back Propagation (LM-BP) neural network model was used to conduct the susceptibility assessment. The risk assessment was carried out on the basis of two assessments. The first, the system of the vulnerability assessment, considered the pipeline position and the angle between the pipe and the landslide (pipeline laying environmental factors). We also used an interpolation theory to generate the standard sample matrix of the LM-BP neural network. Accordingly, a landslide susceptibility risk zoning map was obtained based on susceptibility and vulnerability assessment. The results showed that about 70% of the slopes were in high-susceptibility areas with a comparatively high landslide possibility and that the southern section of the oil pipeline in the study area was in danger. These results can be used as a guide for preventing and reducing regional hazards, establishing safe routes for both existing and new pipelines and safely operating pipelines in the Guangyuan section and other segments of the LCC oil pipeline.

**Keywords:** pipeline, landslide, risk, vulnerability, susceptibility, neural network

## 1. Introduction

By the year 2020, the total mileage of long-distance oil and gas pipelines is expected to exceed 160,000 km in China. This represents a major upsurge in the mileage of multinational long-distance oil and gas pipelines (Huo, Wang, Cao, Wang, & Bureau, 2016). The rapid development of pipelines is associated with significant geological hazards, especially landslides, which increasingly threaten the safe operation of pipelines (P. Wang et al., 2012; Yun & Kang, 2014; Zheng, Zhang, Liu, & Wu, 2012). Landslide disasters cause great harm to infrastructure and human life. Moreover, the wide impact area of landslides restricts the economic development of landslide-prone areas (Ding, Heiser, Hübner, & Fuchs, 2016; Hong, Pradhan, Xu, & Bui, 2015). A devastating landslide can lead to casualties, property losses, environmental damage and long-term service disruptions caused by massive oil and gas leakages (G. Li, Zhang, Li, Ke, & Wu, 2016; Zheng et al., 2012). Generally, pipeline failure or destruction caused by landslides is much more deleterious than the landslides themselves, which makes it important to research the risk assessment of geological landslide hazards in pipeline areas (Inaudi & Glisic, 2006; Mansour, Morgenstern, & Martin, 2011).

Natural disaster risk comprises a combination of natural and social attributes (Atta-Ur-Rahman & Shaw, 2015). The United Nations Department of Humanitarian Affairs expresses natural disaster risk as a product of susceptibility and vulnerability (Rafiq & Blaschke, 2012; Sari, Innaqa, & Safrilah, 2017). In recent years, progress in geographic information systems (GIS) and remote sensing (RS) technologies

have greatly enhanced our ability to evaluate the potential risks that landslides pose to pipelines (Akgun, Kınca, & Pradhan, 2012; B. Li & Gao, 2015; Sari et al., 2017). The disaster risk assessment model has been widely recognized and applied by experts and scholars all over the world. Landslide risk assessment can take the form of a qualitative (T. H. Wu, Tang, & Einstein, 1996), quantitative (Ho, Leroi, & Roberds, 2000) or semi-quantitative assessment (Yingchun Liu, Shi, Lu, Xiao, & Wu, 2015) according to actual demand. Quantitative methods and models that have been proposed for the assessment can be divided into methods of statistical analysis (Sari et al., 2017), mathematical models (Akgun et al., 2012) and machine learning (He & Fu, 2009). However, most of these methods are subjective, such as expert evaluations, analytical hierarchy processes, logistic regressions and fuzzy integration methods, which could affect the accuracy and reasonableness of the evaluation (Fall, Azzam, & Noubactep, 2006; Sarkar & Gupta, 2005). This shortcoming can be overcome through the artificial neural network, especially the mature Back Propagation (BP) Neural Network that is widely used in function approximation and pattern recognition (Ke & Li, 2014a; P. L. Li, Tian, & Li, 2013; Su & Deng, 2003). The evaluation indicator system generally includes disaster characteristics, disaster prevention and pipeline attributes (Jianfeng Li, 2010; Shuiping Li, 2008). The fault tree analysis, fuzzy comprehensive evaluation and the grey theory are used to evaluate the failure probability of the system through indicator weight and scoring (Shi, 2011; Ye, Jiang, Yao, Xia, & Zhao, 2013). In previous studies, pipeline vulnerability evaluation indicators only considered the pipeline itself, and the relationship between the pipeline and environment was rarely examined (W. Feng, Zhang, & Zhang, 2014; Shuiping Li, 2008; Yingchun Liu et al., 2015). In this paper, the interaction between landslide hazards and the pipeline itself was considered, which improved the quantitative degree of the evaluation.

Based on the theory of the LM-BP neural network, a standard sample matrix was developed using the interpolation theory after an analysis of the distribution characteristics of landslides that occurred in the study area was performed and a regional landslide susceptibility assessment was completed. Considering the interaction between landslide disasters and the pipeline itself, the pipeline vulnerability evaluation in the landslide area was realized using the entropy weight method. This paper established a risk assessment model and methods for assessing landslide geological susceptibility of oil pipelines by comprehensively utilizing GIS and RS technology, which together improved the quantitative degree of the assessment.

## 2. Study Area

The study area was Guangyuan City in the Sichuan province, which was further restricted to the area from 105°15' to 106°04' E and 32°03' to 32°45' N, straddling 19 townships in five counties from south to north (Figure 1). The Lanzhou-Chengdu-Chongqing (LCC) Products Oil Pipeline is China's first long-distance pipeline. It begins in Lanzhou City and runs through the Shanxi and Sichuan provinces (Hao & Liu, 2008). Our study area covered sloped areas of the range with 5 km on both sides of the Guangyuan section (82 km) of the oil pipeline. The pipeline within the K558-K642 mileages may be affected by the slope areas. The Guangyuan section, located in northern Sichuan, is a transitional zone from the basin to the mountain. It features a terrain of moderate and low mountains, crisscrossed networks of ravines and a strong fluvial incision. Altitudes in this area range from 328 m to 1505 m. The study area has a subtropical monsoon climate with four distinctive seasons and annual precipitation measuring about 900

mm to 1,000 mm. Moreover, two large unstable faults (the Central Fault of Longmen Mountain and Longmen Mountain's Piedmont Fault Zone) make the area geologically unstable and prone to frequent geological hazards (Shiyuan Li et al., 2012). Guangyuan, through which the pipeline passes, has a high incidence of landslides, some of which have happened 300 times in the Lizhou and Chaotian districts (Y. Zhang, Shi, Gan, & Liu, 2011). In this area, landslide geological hazards seriously threaten the safe operation of the LCC oil pipeline.

### 3. Data Sources

Landslide susceptibility assessment, pipeline vulnerability assessment and geological hazard risk assessment of the landslide pipeline were made successively. Digital elevation model (DEM) data with 30 m accuracy was sourced from the Geospatial Data Cloud (<http://www.gscloud.cn/>). Precipitation data was downloaded from the dataset of annual surface observation values in China between the years 1981 to 2010, as published by the China Meteorological Administration (<http://data.cma.cn/>). This data was collected from 18 meteorological observatories near and within the study area and interpolated using the kriging method (at a resolution of 30 m × 30 m). Geological maps and landslide data (historical landslides) in the study area were obtained from the Sichuan province's geological environmental monitoring station. RS images (GF-1, multispectral 8 m, resolution 2 m) were provided by the Sichuan Remote Sensing Center.

The location of the middle line of the pipeline was detected through the direct connection method (i.e., the transmitter's output line was directly connected to the metal pipeline) using an RD8000 underground pipeline detector. Pipeline midline coordinates were measured using total network Real Time Kinematic technology, and simultaneously, the coordinates of the pipe ancillary facilities (including test piles, mileage piles and milestones) were acquired. Mileage data obtained through inner pipeline detection was derived from the China Petroleum Pipeline Company.

### 4. Methods

#### 4.1 Assessment unit

Division precision and the scale of the slope unit (i.e., the basic element for a regional landslide susceptibility assessment) were in keeping with the results of the evaluation (Qiu, Niu, ZhaoYannan, & Wu, 2015). A total of 315 slope units were divided using hydrologic analysis in ArcGIS (v. 10.4) (Fig. 2a). The irrational unit was artificially identified and modified by comparing GF-1 satellite remote sensing images. Boundary correction, fragment combination and fissure filling were used for modification.

The object of the pipeline vulnerability assessment in the landslide area was the pipeline. Considering both previous research and the particulars of the research object, we used a comprehensive segmentation method based on GIS to divide the pipelines in our study. A total of 180 pipes were divided in the study area, of which the longest was about 1.7 km, and the shortest was only about 10 m (Fig. 2b).

#### 4.2 Assessment indicators

Based on selection principles of the indicator system and the formation mechanism of landslide geological hazards, as few indicators as possible were selected to reflect the degree of danger posed by the landslide as accurately as possible (Avalon Cullen, Al-Suhili, & Khanbilvardi, 2016; Jaiswal, Westen, & Jetten, 2010; Ray, Dimri, Lakhera, & Sati, 2007). The internal factors in these indicators of the paper included topography, geological structure, stratigraphic lithology and surface coverage. Similarly, the external factors included mean annual precipitation (MAP) and the coefficient of the variation of annual rainfall (CVAR). The correlations between indicators were analyzed using R (v. 3.3.1), and the results showed a significant correlation between MAP and CVAR ( $R = 0.99$ ) and between NDWI and NDVI ( $R = 0.87$ ). Based on correlation and standard deviation, CVAR and NDWI were eliminated from the original evaluation system for landslide susceptibility assessment in the pipeline area (Table 1).

Generally, the evaluation indicator of pipeline vulnerability as it relates to the relationship between a pipeline and its surrounding environment is rarely considered. The evaluation indicators in this paper were refined to include pipeline parameters and the spatial relationship between a pipeline and landslide. The pipelines in the study area were based in mountainous areas and had been running for many years. All of these pipelines consisted of high-pressure pipes that were made of steel tubes and had a diameter of 610 mm for conveying oil. In keeping with the theory of the entropy weight method, these indicators (e.g., pressure, materials, diameter and media) were not included in the final evaluation system used to determine pipeline vulnerability.

#### 4.3 LM-BP neural network Model

The neural network, an abstract model of our brain, constructs calculating units connecting with one another. Neural network has an input layer, a hidden layer and an output layer. With its good performance on nonlinear statistical modeling, it is very useful in exploring the hidden relationships between the inputs and the outputs (Z. Wu & Wang, 2016). BP Neural network with many adjustable parameters has powerful parallel processing mechanism, high flexibility and is good at dealing with a lot of uncertain information. The mechanism of landslide evaluation is complex, with many uncertainties and incomplete information (Jie et al., 2015). The BP neural network model can find out the intrinsic rules from the vast amount of complex and fuzzy data in the changing environment and make corresponding inferences. This method can be applied to the landslide susceptibility assessment of pipeline area with more qualitative information and less quantitative information, and the more accurate assessment results can be obtained from the analysis of these fuzzy information. Landslide susceptibility assessment is essentially a study of pattern recognition (F. Feng, Wu, Niu, Xu, & Yu, 2017). BP neural network can approximate arbitrary continuous function with arbitrary precision, so it is widely used in non-linear modeling, pattern recognition and pattern classification (Xiong, Ran, Xiong, Li, & Ye, 2010). Because the BP neural network model is widely used, there are many successful cases for reference in the number of neurons in each layer, the parameters of network learning and the optimization of algorithms, which can effectively improve the reliability and accuracy of the model (Ke & Li, 2014b).

The LM algorithm, also known as the damped least square method, has the advantage of local fast convergence. Its strong global searching ability contributes to the strong extrapolation ability of the trained network. LM algorithm is a combination of gradient descent method and Gauss-Newton

method. Its iteration process is no longer along a single negative gradient direction, which greatly improves the convergence speed and generalization ability of the network (Jing Li, Feng, Wang, & Zhang, 2016). The BP neural network model, optimized by the LM algorithm, was used to evaluate the regional landslide susceptibility in this study. MATLAB 2014 with the *trainlm* training function was used to implement the LM-BP neural network. The flow chart of LM-BP neural network algorithm is shown in Figure 3.

Data from 106 landslide disasters was collected near the research area. Of these landslides, 23 were within the region of the study area. Most of the landslides located outside the study area were less than 20 km away from the pipeline. Due to comparable environmental conditions, these landslides could still help us identify the relationship between landslides and environment factors. In light of the frequency distribution of each evaluation indicator (Fig. 4), the landslide susceptibility grade corresponding to each interval of the indicators was divided, and then the susceptibility degree monotonicity in each interval was decided. For this study, the landslide susceptibility grade was divided into four levels: low (I), medium (II), high (III) and extremely high (IV). Based on previous research experience and field investigations (Appendix 8), the monotonous intervals of different indicators of susceptibility degrees were judged (Appendix 1). For instance, there were hardly any landslides, only collapses that occurred in slopes above 60 degrees. Besides, the susceptibility degree in the area was monotone decreasing in the interval of [60, 90]. Because of the very small sliding force in a slope at 0 degrees to 15 degrees, landslides were rare to occur here, even under other extreme conditions. (Q. Zhang, Xu, Wu, & Li, 2015). On the basis of the classification criteria of the evaluation indicators used to predict landslide susceptibility degree and the functional relationship between the evaluation indicators and landslide probabilities, standard samples (training samples and test samples) were built using a certain mathematical method. According to the order of susceptibility from low to high, Interpolation was performed in each interval and the sample vectors of each evaluation indicator were constructed. Each 200 is a susceptibility level, and the sample vector length of each evaluation indicator is 800. The interval of the susceptibility degree is [0, 1], and the output vector is obtained by interpolating 800 values equidistantly between the interval of [0, 1]. Sample matrix is built by interpolation theory, which avoids the excess human influence in the process of building neural network model by traditional methods. The training samples and test samples were evaluated using similar construction methods but with different sample sizes. Finally, the indicator data was normalized, it was entered into the LM-BP neural network for simulation and 315 slope unit landslide susceptibility values were output.

#### 4.4 Vulnerability assessment model for pipelines

The vulnerability evaluation model of pipelines in the landslide area was established using the entropy weight method, which overcame the shortcomings of the traditional weight method that does not consider the different evaluation indicators and the excessive human influence on the process of evaluation (Gao, Li, Wang, Li, & Lin, 2017; Pal, 2014). Entropy is a method of measuring the uncertainty of information by using probability theory (P. Liu & Zhang, 2011). The entropy indicates the extent of difference in an indicator, and the more difference of the data, the greater the role in evaluation (Jia, Zhao, Nan, & Zhao, 2007). The extremum difference method was used to normalize each indicator value. The decision

information of each index can be expressed by entropy value  $e_i$ :

$$r_{ij} = \frac{x_{ij} - \min_j \{x_{ij}\}}{\max_j \{x_{ij}\} - \min_j \{x_{ij}\}}, \quad r_{ij} = \frac{\max_j \{x_{ij}\} - x_{ij}}{\max_j \{x_{ij}\} - \min_j \{x_{ij}\}} \quad (1)$$

$$e_i = \frac{\sum_{j=1}^n p(x_{ij}) \ln p(x_{ij})}{\ln(n)} \quad (2)$$

$$p(x_{ij}) = \frac{r_{ij}}{\sum_{j=1}^n r_{ij}} \quad (3)$$

$$w_i = \frac{1 - e_i}{m - \sum_{i=1}^m e_i} \quad (4)$$

$$H_j = \sum_{i=1}^m w_i r_{ij} \quad (5)$$

where  $n$  is the number of evaluation objects, and  $r_{ij}$  represents the  $i^{\text{th}}$  evaluation indicator values of  $j^{\text{th}}$  pipe sections.  $H_j$  is the evaluation value of the pipeline section's vulnerability;  $w_i$  is the weight of the evaluation indicator;

Pipeline defect density was obtained from the pipeline internal inspection data, which consisted of both mileage data that needed to be converted into three-dimensional coordinate data and pipeline center line coordinate data obtained through C# programming. In addition, the main slide direction of the landslide was replaced by the slope direction that was extracted by DEM. The coordinate azimuth of the pipe section was extracted using the linear vector data of each pipe section, and the angle between the pipeline and the slope was calculated using the mathematical method. The calculation process was solved in the VB language on ArcGIS using second development functions. Finally, the entropy weight of 5 indicators was calculated by programming in MATLAB 2014. The entropy weight calculation results for pipeline landslide vulnerability assessment are shown in Table 2.

## 5 Results and Comparison

### 5.1 Regional landslide susceptibility assessment

The LM-BP neural network was trained and the network was stopped after 182 iterations. An RMSE value of 9.93e-09 indicated that the goal of precision had been reached. Through the simulation of the network test, none of the absolute error values of test data (20 groups) were found to be greater than 0.02; this result aligned with our expectation of the precision of the landslide susceptibility assessment. The landslide susceptibility grade was divided into four levels by using the equal interval method at intervals of 0.25. The safe section (low susceptibility) was located in the central part of the study area. The dangerous (high susceptibility) section was located north and south (Fig. 5). In the study area, most of the exposed rock was dominated by shale, which belonged to the easy-slip rock group.

Average altitude ranged from 450 m to 1400 m, and the relative height difference was greater than 80 m, with the slope between 15 ° and 35 °. Based on an overlay analysis of historic landslides within the study area, and susceptibility zonation maps, we surmised that the probability of landslides in the study area was extremely high, and that 87% of the landslides occurred in the medium-, high-, and extremely high-susceptibility areas. Among these landslides, three were located in low-susceptibility areas, which accounted for 13% of the landslide disaster sites, five occurred in medium-susceptibility areas (accounting for 21.7% of disaster sites), seven occurred in high-susceptibility areas (accounting for 30.4% of sites) and eight occurred in extremely high-susceptibility areas (accounting for 34.8% of sites). The evaluation results were found to accurately reflect the trends and rules of distribution of landslides in the study area. The number and area of slopes in high-susceptibility and extremely high-susceptibility areas accounted for about 70% of the total (Table 3). The probability of landslide occurrence in the study area was generally high, which was consistent with the fact that the region was landslide-prone.

## 5.2 Vulnerability assessment for oil pipeline in landslide area

The equal interval of 0.25 was used to divide the pipeline vulnerability level into four grades to obtain the pipeline vulnerability zonation of the study area (Fig. 6). The pipeline in the northern part of the study area was given a low vulnerability grade, while the situation in the south of the region is more serious. The number, length and percentage of pipeline segments with different grade vulnerabilities are shown in Table 4. The number and length of pipeline segments in highly vulnerable areas (III) and extremely vulnerable areas (IV) accounted for about 12% of the total.

## 5.3 Risk assessment for oil pipeline in landslide area

According to natural disaster risk expressions released by the UN, the definition of risk may be expressed as the product of landslide susceptibility in a pipeline area and pipeline vulnerabilities in the landslide area. **Scientific analysis and expression of disaster risk assessment results can simplify complex risk assessment and make the micro results macro (Ding & Tian, 2013). There is no unified criterion for disaster evaluation zoning, and the equal interval method is one of the methods to express the results more intuitively (H. Hu, Dong, & Pan, 2011; Jin & Meng, 2011; Y. Wang, Hao, Zhao, & Fang, 2011). The susceptibility degrees and vulnerability degrees were distinguished using the equal interval method, and four risk grades were then automatically generated.** Where the comprehensive risk assessment value was within 0 to 0.0625, the corresponding risk grade was Grade I; the corresponding risk grades with the values of 0.0625 to 0.25, 0.25 to 0.5625 and 0.5625 to 1.0 were Grade II, III and IV, respectively. The risk grade of each section of the pipeline within the research area is shown in Fig. 7.

The number of sections with a high-risk grade was 33, which accounted for 18.33% of all pipeline sections and represented 16.57% of the total pipeline length of 13.461 km). There were 4 sections with extremely high-risk grade, which accounted for 2.22% of all sections and represented 3.31% of the total pipeline length of 2.538 km. The section number and length of pipelines lying in high-risk (III) and extremely high-risk (IV) areas accounted for 20% of the total pipeline length, and the risk grade of pipelines inside Qingchuan and Jian'ge County was relatively high.

## 5.4 Analysis of risk assessment results



Large or huge landslides were common in areas that we categorized as extremely high risk, which we defined as those that were geologically evolving or had experienced obvious deformations within the last 2 years with still visible cracks. These pipelines were subject to dangers at any time, as the pipelines within the areas prone to landslides were found to contain many defects or extensive damage. These areas also posed considerable threats; for example, pipeline ruptures or breaks could lead to leakages or serious deformations that cause transportation failure. Because these are unacceptable events, risk prevention and control measures must be taken in a short time. Pipelines with extremely high risk were mainly distributed in the following areas: (1) Xiasi Village in Xiasi County (Pile No. K628-K630); (2) Shiweng Village-Maliu Village of Xiasi County (Pile No. K635-K637). This section lay in the south of the research area, with an altitude of 500 m to 750 m. Here, the slope conditions affected the distribution of groundwater pore pressure and the physical and mechanical characteristics of the rock and soil in three areas: vegetation cover, evaporation and slope erosion. Ultimately, these three factors affected slope stability (Luo & Tan, 2011). Vertical and horizontal ravines have also been seen in this section, with a relative height difference greater than 100 m and slope between 15 ° to 35 °. Slope degrees with obvious changes had a great influence on slope stability (Chang & Kim, 2004; W. Hu, Xu, Wang, Asch, & Hicher, 2015). The exposed rocks in this area were mainly shale and belonged to the sliding-prone rock group. Rock type and interlayer structure were found to be important internal indicators that a landslide could occur (Guzzetti, Cardinali, & Reichenbach, 1996; Xiang et al., 2010; Xin, Chong, & Dai, 2009). The distance between the fault and the pipeline in the section was about 2 km with a NDVI of about 0.75 and MAP of about 970 mm. Faulted zones and nearby rock and earth masses that were destroyed in a geologic event reduced the integrity of a slope, and the faults and important groundwater channels could also cause deformation and damage of a slope (Yinghui Liu, 2009). The pipelines in these areas exhibited many defects. Most pipelines passed through the slope in an inclined or horizontal way, an attribute that typically increased the risk of a landslide occurring.

In high-risk areas, small or moderate landslides commonly occurred in areas that we categorized as high risk. They were in deformation, or had obvious deformation recently (within 2 years), such as obvious cracks, subsidence or tympanites on the landslide and even shear. The pipelines in these areas had defects and were buried at a shallow depth. If a landslide occurred in this pipeline area, it could cause pipe suspension, floating and damage. It could also contribute to a small to moderate leakage of the medium. However, damaged pipes can be welded or repaired. Monitoring is critical in high-risk areas. In our study, the pipeline high-risk area was defined by the following areas: (1) Xiasi Town Xiasi Village-Shiweng Village (pipe No. K622-K633). (2) Xiasi Town Maliu Village Jinzishan Xiangdasang Village (pipe No. K635-K642). This area was located in the south of the pipe, which was buried in the study area. The altitude of the study area was between 450 m and 800 m, the relative elevation difference was over 100m and the slope was between 15 ° and 40 °. Most of the outcrops in this area were quartz sandstone, which belonged to the easy-sliding rock group. The pipes in this area were about 2.5 km away from faults. The NDVI was about 0.6 to 0.8, and MAP was about 970 nm. Pipes showed many defects, most of them either crossing the slope or lying in the center of slope. All of the above factors provided sufficient conditions for the formation of landslide.

In the medium-risk areas, only small landslides were found to occur, and we observed no sign of

deformation. But through the analysis of geological structure, topography and landform, we found the area to demonstrate a tendency for developing landslides. The pipes in this risk area exhibited almost no faults and were buried deep beneath the ground. However, under bad conditions, the landslides in these areas could also affect the pipes' safety, causing the pipes to become exposed or deformed. These areas need simple monitoring. For our study, medium-risk areas were defined as follows: (1) Sanlong village of Dongxihe township-Panlong town Dongsheng village (pipe No. K559-K593). (2) Panlong town Qinlao village-Wu'ai village (pipe No. K595-K597). (3) Baolun town Laolin'gou village-Xiasi town Youyu village (pipe No. K599-K630).

In the low-risk areas, landslides didn't occur under ordinary conditions, but they could occur if a strong earthquake hit or if the area experienced continuous or heavy rain. The pipes in low-risk areas showed no defects and were buried very deep. They were also located far away from areas affected by landslides. Therefore, landslides in these areas caused no obvious damage to the pipes, and few threatened the safety of pipes. However, regular inspection is necessary to ensure that the pipes continue to operate safely. The pipe low-risk area were defined as follows: (1) Panlong town Dongsheng village-Qinlao village (pipe No. K591-K597). (2) Baolun town Xiaojia village-Baolun town Laolin'gou village (pipe No. K599-K608).

Through comprehensive analysis of each risk level area, we compiled a list of pipeline landslide risks (Table 6). This list describes each landslide risk level in four respects: pipeline risk, landslide susceptibility, pipeline vulnerability and risk control measures.

The main purpose of this study was to provide managers and planners with a comprehensive assessment of landslide risk in pipeline area. The results offer information on the possibility of failure of slopes or even pipelines in an area in the future, rather than the area that may be damaged by landslides. The landslide susceptibility maps could help planners reorganize and plan future pipeline construction. Pipeline vulnerability maps could assist engineers for pipeline maintenance operation. Based on this final risk map, managers and engineers can then make decisions and formulate prescriptions that will have highly predictable results for safely transporting medium, settlement relocation, and significantly reducing risk of any adverse effects.

Future research could explore detailed comparison of different methods, and finalize an optimal method. Moreover, it is possible that the information needed for the landslide risk assessments can be obtained by simple and effective ways, if plan to build database. Meanwhile, the landslide risk assessment model can be designed as dynamic systems, as the developments in computer and GIS technologies. The system predicts possible future landslides or pipeline damaged by inputting the information obtained in the database, and various adjustment factors.

## 6 Conclusion

The faults inherent to traditional landslide risk assessment include excessive human influence, failure of pipeline vulnerability assessments to consider the interaction between landslide disaster and pipeline ontology and the low quantification degree of risk assessment results.

Taking the Guangyuan section (82 km) of the LCC oil and gas pipeline as an example, we used GIS

and RS technology to establish a regional landslide susceptibility assessment model based on the LM-BP neural network. We determined that there were 112 and 108 slopes in high-susceptibility and extremely high-susceptibility areas that accounted for 33.18% and 40.46% of the total area of the study area, respectively. Then, we established the model of pipeline vulnerability evaluation based on the entropy weight method by combining the pipeline body and the environmental information. The number and length of pipe segments in the highly vulnerable (III) and extremely vulnerable area (IV) accounted for about 12% of the total. Finally, based on the susceptibility assessment and the vulnerability assessment, we completed the risk assessment and risk division of the oil pipeline, thus forming a geological disaster risk assessment model and a method for oil pipeline and landslide risk assessment. The risk assessment results demonstrated that the number and length of high-susceptibility and extremely high-susceptibility pipeline segments represented 20% of the total. Similarly, the pipeline risk within Qingchuan and Jian'ge Counties was relatively high. Our pipeline landslide risk assessment has laid a foundation for the future study of pipeline safety management and pipeline failure consequence loss assessment.

### **Acknowledgments**

The study has been funded by the Strategic Priority Research Program of Chinese Academy of Sciences (XDA20030302), IWHR(China Institute of Water Resources and Hydropower Research) National Mountain Flood Disaster Investigation Project (SHZH-IWHR-57), Southwest Petroleum University Of Science And Technology Innovation Team Projects (2017CXTD09) and the Study on temporal and spatial differentiation of historical mountain flood disasters in Fujian province (NDMBD2018003).

## References

- Akgun, A., Kincal, C., and Pradhan, B.: Application of remote sensing data and GIS for landslide risk assessment as an environmental threat to Izmir city (west Turkey). *Environmental Monitoring & Assessment*, 184(9), 5453-5470. [https://doi: 10.1007/s10661-011-2352-8](https://doi.org/10.1007/s10661-011-2352-8) 2012.
- Atta-Ur-Rahman, and Shaw, R. (2015). *Hazard, Vulnerability and Risk: The Pakistan Context*: Springer Japan.
- Avalon Cullen, C., Al-Suhili, R., and Khanbilvardi, R.: Guidance Index for Shallow Landslide Hazard Analysis. *Remote Sensing*, 8(10), 866. [https://doi: 10.3390/rs8100866](https://doi.org/10.3390/rs8100866), 2016.
- Chang, H., and Kim, N. K.: The evaluation and the sensitivity analysis of GIS-based landslide susceptibility models. *Geosciences Journal*, 8(4), 415-423. [https://doi: 10.1007/BF02910477](https://doi.org/10.1007/BF02910477), 2004.
- Ding, M., Heiser, M., Hübl, J., and Fuchs, S.: Regional vulnerability assessment for debris flows in China—a CWS approach. *Landslides*, 13(3), 537-550. [https://doi: 10.1007/s10346-015-0578-1](https://doi.org/10.1007/s10346-015-0578-1) 2016.
- Ding, M., and Tian, S. (2013). *Landslide and Debris Flow Risk Assessment and Its Application* Beijing: Science Press.
- Fall, M., Azzam, R., and Noubactep, C.: A multi-method approach to study the stability of natural slopes and landslide susceptibility mapping. *Engineering Geology*, 82(4), 241-263. 2006.
- Feng, F., Wu, X., Niu, R., Xu, S., and Yu, X.: Landslide susceptibility assessment based on PSO-BP neural network. *Science of Surveying* Mapping, 42(10), 170-175. [https://doi: 10.16251/j.cnki.1009-2307.2017.10.027](https://doi.org/10.16251/j.cnki.1009-2307.2017.10.027), 2017.
- Feng, W., Zhang, T., and Zhang, Y.: Evaluating the stability of landslides in xianshizhai village and the pipeline vulnerability with their action. *Journal of Geological Hazards & Environment Preservation*. 2014.
- Gao, C. L., Li, S. C., Wang, J., Li, L. P., and Lin, P.: The Risk Assessment of Tunnels Based on Grey Correlation and Entropy Weight Method. *Geotechnical & Geological Engineering*(4), 1-11. [https://doi: 10.1007/s10706-017-0415-5](https://doi.org/10.1007/s10706-017-0415-5) 2017.
- Guzzetti, F., Cardinali, M., and Reichenbach, P.: The Influence of Structural Setting and Lithology on Landslide Type and Pattern. *Environmental & Engineering Geoscience*, 2(4), 531-555. 1996.
- Hao, J., and Liu, J.: Zonation of Danger Degree of Geological Hazards over Lanzhou-Chengdu-Chongqing Products Pipeline. *Oil & Gas Storage & Transportation*. 2008.
- He, Y., and Fu, W.: Application of fuzzy support vector machine to landslide risk assessment. *Journal of Natural Disasters*, 18(5), 107-112. 2009.
- Ho, K., Leroy, E., and Roberds, B.: *Quantitative Risk Assessment : Application, Myths and Future Direction*. 2000.
- Hong, H., Pradhan, B., Xu, C., and Bui, D. T.: Spatial prediction of landslide hazard at the Yihuang area (China) using two-class kernel logistic regression, alternating decision tree and support vector machines. *Catena*, 133, 266-281. [https://doi: 10.1016/j.catena.2015.05.019](https://doi.org/10.1016/j.catena.2015.05.019) 2015.
- Hu, H., Dong, P., and Pan, j.: The Hail Risk Zoning in Beijing Integrated with the Result of Its Loss Assessment. *Journal of Applied Meteorological Science*, 22(5), 612-620. 2011.
- Hu, W., Xu, Q., Wang, G. H., Asch, T. W. J. V., and Hicher, P. Y.: Sensitivity of the initiation of debris flow to initial soil moisture. *Landslides*, 12(6), 1139-1145. [https://doi: 10.1007/s10346-014-0529-2](https://doi.org/10.1007/s10346-014-0529-2) 2015.
- Huo, F., Wang, W., Cao, Y., Wang, F., and Bureau, C. P.: China's Construction Technology of Oil and Gas Storage and Transportation and Its Future Development Direction. *Oil Forum*. 2016.
- Inaudi, D., and Glisic, B.: Reliability and field testing of distributed strain and temperature sensors. *Proceedings of SPIE - The International Society for Optical Engineering*, 6167(14), 2586–2597.

[https://doi: 10.1117/12.661088](https://doi.org/10.1117/12.661088) 2006.

Jaiswal, P., Westen, C. J. V., and Jetten, V.: Quantitative landslide hazard assessment along a transportation corridor in southern India. *Engineering Geology*, 116(3), 236-250. [https://doi: 10.1016/j.enggeo.2010.09.005](https://doi.org/10.1016/j.enggeo.2010.09.005), 2010.

Jia, Y., Zhao, J., Nan, Z., and Zhao, C.: The Application of Entropy-right Method to the Study of Ecological Security Evaluation of Grassland——A Case Study at the Ecological Security Evaluation of Grassland to Pastoral Area of Gansu. *Journal of Arid Land Resources Environmental & Engineering Geoscience*. [https://doi: 10.1016/S1872-5791\(08\)60002-0](https://doi.org/10.1016/S1872-5791(08)60002-0) 2007.

Jie, D., Yamagishi, Hiromitsu, Reza, P. H., Yunus, A. P., Xuan, S., Xu, Y., and Zhu, Z.: An integrated artificial neural network model for the landslide susceptibility assessment of Osado Island, Japan. *Natural Hazards*, 78(3), 1749-1776. 2015.

Jin, Y., and Meng, J. J.: Assessment and forecast of ecological vulnerability:A review. *Chinese Journal of Ecology*, 30(11), 2646-2652. 2011.

Ke, F., and Li, Y.: The forecasting method of landslides based on improved BP neural network. *Geotechnical Investigation & Surveying*. 2014a.

Ke, F., and Li, Y.: The forecasting method of landslides based on improved BP neural network. *Geotechnical Investigation Surveying*, 42(8), 55-60. 2014b.

Li, B., and Gao, Y. (2015). Application of the improved fuzzy analytic hierarchy process for landslide hazard assessment based on RS and GIS. Paper presented at the International Conference on Intelligent Earth Observing and Applications.

Li, G., Zhang, P., Li, Z., Ke, Z., and Wu, G.: Safety length simulation of natural gas pipeline subjected to transverse landslide. 2016.

Li, J. (2010). Wenchuan Earthquake and Secondary Geological Hazard Assessment Based on RS/GIS Technology. (Master), China University of Geosciences, Beijing, China.

Li, J., Feng, J., Wang, W., and Zhang, F.: Spatial and Temporal Changes in Solar Radiation of Northwest China Based LM-BP Neural Network. *Scientia Geographica Sinica*, 36(5), 780-786. [https://doi: 10.13249/j.cnki.sgs.2016.05.017](https://doi.org/10.13249/j.cnki.sgs.2016.05.017), 2016.

Li, P. L., Tian, W. P., and Li, J. C.: Analysis of landslide stability based on BP neural network. *Journal of Guangxi University*. 2013.

Li, S. (2008). The Risk Assessment Study on the Environmental Geological Hazards along the West-East Nature Gas Pipeline. (Mater), SouthWest JiaoTong University, Chengdu, China.

Li, S., Jian, j., Wu, Z., Li, S., Li, H., Bai, K., Ke, Q., Xu, Y., and Hu, Y.: A Design of the Geo-Environmental Management Database System for Guangyuan City *Journal of Geological Hazards and Environment Preservation*, 23(3), 7. 2012.

Liu, P., and Zhang, X.: Research on the supplier selection of a supply chain based on entropy weight and improved ELECTRE-III method. *International Journal of Production Research*, 49(3), 637-646. [https://doi: 10.1080/00207540903490171](https://doi.org/10.1080/00207540903490171), 2011.

Liu, Y. (2009). The characteristic and evaluation of collapse and landslide disaster along du-wen highway in Wenchuan earthquake region. (Master), Lanzhou University, Lanzhou.

Liu, Y., Shi, Y., Lu, Q., Xiao, H., and Wu, S.: Risk Assessment of Geological Disasters in Single Pipe Based on Scoring Index Method: A Case Study of Soil Landslide. *Natural Gas Technology & Economy*. 2015.

Luo, Z. F., and Tan, D. J.: Landslide Hazard Evaluation in Debris Flow Catchment Area Based on GIS and Information Method. *China Safety Science Journal*, 21(11), 144-150. [https://doi: 10.1631/jzus.B1000265](https://doi.org/10.1631/jzus.B1000265) 2011.

Mansour, M. F., Morgenstern, N. R., and Martin, C. D.: Expected damage from displacement of slow-moving slides. *Landslides*, 8(1), 117-131. [https://doi: 10.1007/s10346-010-0227-7](https://doi.org/10.1007/s10346-010-0227-7) 2011.

Pal, R.: Entropy Production in Pipeline Flow of Dispersions of Water in Oil. *Entropy*, 16(8), 4648-4661. [https://doi: 10.3390/e16084648](https://doi.org/10.3390/e16084648) 2014.

Qiu, D., Niu, R., ZhaoYannan, and Wu, X.: Risk Zoning of Earthquake-Induced Landslides Based on Slope Units:A Case Study on Lushan Earthquake. *Journal of Jilin University*, 45(5), 1470-1478. [https://doi: 10.13278/j.cnki.jjuese.201505201](https://doi.org/10.13278/j.cnki.jjuese.201505201) 2015.

Rafiq, L., and Blaschke, T.: Disaster risk and vulnerability in Pakistan at a district level. *Geomatics Natural Hazards & Risk*, 3(4), 324-341. [https://doi: 10.1080/19475705.2011.626083](https://doi.org/10.1080/19475705.2011.626083) 2012.

Ray, P. K. C., Dimri, S., Lakhera, R. C., and Sati, S.: Fuzzy-based method for landslide hazard assessment in active seismic zone of Himalaya. *Landslides*, 4(2), 101. [https://doi: 10.1007/s10346-006-0068-6](https://doi.org/10.1007/s10346-006-0068-6) 2007.

Sari, D. A. P., Innaqa, S., and Safrilah. Hazard, Vulnerability and Capacity Mapping for Landslides Risk Analysis using Geographic Information System (GIS). 209(1), 012106. [https://doi: 10.1088/1757-899X/209/1/012106](https://doi.org/10.1088/1757-899X/209/1/012106) 2017.

Sarkar, S., and Gupta, P. K.: Techniques for Landslide Hazard Zonation – Application to Srinagar-Rudraprayag Area of Gar. *Journal of the Geological Society of India*, 65(2), 217-230. 2005.

Shi, S.: Risk Analysis for Pipeline Construction about Third Party Damage Based on Triangular Fuzzy Number and Fault Tree Theory. *Journal of Chongqing University of Science & Technology*. 2011.

Su, G., and Deng, F.: On the Improving Backpropagation Algorithms of the Neural Networks Based on MATLAB Language:A Review. *Bulletin of Science & Technology*. 2003.

Wang, P., Xu, Z., Bai, M., Du, Y., Mu, S., Wang, D., and Yang, Y.: Landslide Risk Assessment Expert System Along the Oil and Gas Pipeline Routes. *Advanced Materials Research*, 418-420, 1553-1559. [https://doi: 10.4028/www.scientific.net/AMR.418-420.1553](https://doi.org/10.4028/www.scientific.net/AMR.418-420.1553) 2012.

Wang, Y., Hao, J., Zhao, F., and Fang, L.: A Discussion on Regional Risk Zoning of Geological Hazard in the Worst-hit Area of the Wenchuan Earthquake in Shaanxi Province. *Journal of Catastrophology*, 26(4), 35-39. [https://doi: 10.1007/s12583-011-0163-z](https://doi.org/10.1007/s12583-011-0163-z), 2011.

Wu, T. H., Tang, W. H., and Einstein, H. H. (1996). *Landslides: investigation and mitigation*. chapter 6 - landslide hazard and risk assessment.

Wu, Z., and Wang, H.: Super-resolution Reconstruction of SAR Image based on Non-Local Means Denoising Combined with BP Neural Network. 2016.

Xiang, L. Z., Cui, P., Zhang, J. Q., Huang, D. C., Fang, H., and Zhou, X. J.: Triggering factors susceptibility of earthquake-induced collapses and landslides in Wenchuan County. *Journal of Sichuan University*, 42(5), 105-112. 2010.

Xin, Y., Chong, X. U., and Dai, F. C.: Contribution of strata lithology and slope gradient to landslides triggered by Wenchuan Ms 8 earthquake,Sichuan,China. *Geological Bulletin of China*, 28(8), 1156-1162. 2009.

Xiong, H., Ran, Y., Xiong, G., Li, S., and Ye, L.: Study on deformation prediction of landslide based on genetic algorithm and improved BP neural network. *Kybernetes the International Journal of Systems Cybernetics*, 39(8), 1245-1254. 2010.

Ye, C., Jiang, H., Yao, A., Xia, Q., and Zhao, X.: Study on risk controlling method of third party construction damage on oil and gas pipeline. *Journal of Safety Science & Technology*, 9(8), 140-145.

507 2013.  
 508 Yun, L., and Kang, L.: Reliability Analysis of High Pressure Buried Pipeline under Landslide. *Applied*  
 509 *Mechanics & Materials*, 501-504, 1081-1086. [https://doi: 10.4028/www.scientific.net/AMM.501-](https://doi.org/10.4028/www.scientific.net/AMM.501-504.1081)  
 510 504.1081 2014.  
 511 Zhang, Q., Xu, Q., Wu, L., and Li, J.: BP neural network model for forecasting volume of landslide group  
 512 in Nanjiang. *Hydrogeology and Engineering Geology*, 42(1), 6. 2015.  
 513 Zhang, Y., Shi, J., Gan, J., and Liu, C.: Analysis of Distribution Characteristics and Influencing Factors  
 514 of Secondary Geohazards in Guangyuan City——Taking Chaotian District as an Example. *Journal of*  
 515 *Catastrophology*, 26(1), 75-79. [https://doi: 10.1007/s12182-011-0118-0](https://doi.org/10.1007/s12182-011-0118-0) 2011.  
 516 Zheng, J. Y., Zhang, B. J., Liu, P. F., and Wu, L. L.: Failure analysis and safety evaluation of buried  
 517 pipeline due to deflection of landslide process. *Engineering Failure Analysis*, 25(4), 156-168. [https://doi:](https://doi.org/10.1016/j.engfailanal.2012.05.011)  
 518 10.1016/j.engfailanal.2012.05.011 2012.  
 519

|     |                                                                                                                  |
|-----|------------------------------------------------------------------------------------------------------------------|
| 520 | <b>List of tables and figures</b>                                                                                |
| 521 | <b>Table 1</b> Indicators of landslide susceptibility assessment and pipeline vulnerability assessment           |
| 522 | <b>Table 2</b> Entropy weight of evaluation indicator                                                            |
| 523 | <b>Table 3</b> Number and area of slopes of four hazard grade                                                    |
| 524 | <b>Table 4</b> Number and distances of pipeline of four vulnerability grade                                      |
| 525 | <b>Table 5</b> Number and distances of pipeline of four risk grade                                               |
| 526 | <b>Table 6</b> Description of pipeline risk level                                                                |
| 527 |                                                                                                                  |
| 528 | <b>Figure 1</b> Landslide location map of the study area                                                         |
| 529 | <b>Figure 2</b> All slope units (a) and pipeline section (b) in the study area                                   |
| 530 | <b>Figure 3</b> Flow chart of LM-BP neural network algorithm                                                     |
| 531 | <b>Figure 4</b> The frequency distribution of each indicator in the landslide location. Maps (a), (b), (c), (d), |
| 532 | (e), (f), (g), and (h) represent the elevation, slope, aspect, height difference, TPC, NVI, MAP, and             |
| 533 | distance from the fault, respectively                                                                            |
| 534 | <b>Figure 5</b> Landslide hazard map of study area                                                               |
| 535 | <b>Figure 6</b> Pipeline vulnerability map of study area                                                         |
| 536 | <b>Figure 7</b> Pipeline risk map of study area                                                                  |
| 537 |                                                                                                                  |



538  
539  
540  
541  
542  
543  
544  
545  
546

Table 1

| Factor                                             |                                                     | Indicators                          |
|----------------------------------------------------|-----------------------------------------------------|-------------------------------------|
| Landslide hazard indicator                         | Landform                                            | Elevation                           |
|                                                    |                                                     | Slope                               |
|                                                    |                                                     | Aspect                              |
|                                                    |                                                     | Height Difference                   |
|                                                    |                                                     | Topographic profile curvature (TPC) |
|                                                    | Land cover                                          | NDVI                                |
|                                                    |                                                     | NDWI                                |
|                                                    | Geology                                             | Lithology                           |
|                                                    |                                                     | Distance from the fault             |
|                                                    | Precipitation                                       | Mean annual precipitation (MAP)     |
| Coefficient of variation of annual rainfall (CVAR) |                                                     |                                     |
| Pipeline vulnerability indicator                   | Pipe Body                                           | Defect Density                      |
|                                                    |                                                     | Depth                               |
|                                                    |                                                     | Thickness                           |
|                                                    |                                                     | Pressure                            |
|                                                    |                                                     | Materials                           |
|                                                    |                                                     | Diameter                            |
|                                                    | Spatial relationship between pipeline and landslide | Media                               |
|                                                    |                                                     | Position                            |
|                                                    |                                                     | Angle                               |

547  
548  
  
549

550  
551  
552  
553  
554  
555  
556  
557  
558  
559  
560  
561  
562  
563  
564  
  
565  
  
566

**Table 2**

|         | Depth    | Angle    | Defect Density | Thickness | Position |
|---------|----------|----------|----------------|-----------|----------|
| Weight  | 0.010007 | 0.101553 | 0.678851       | 0.154322  | 0.055266 |
| Entropy | 0.997322 | 0.97282  | 0.818308       | 0.958696  | 0.985208 |

567

Table 3

| Landslide<br>susceptibility | Number of<br>slopes | Percentage (%) | Area (km <sup>2</sup> ) | Percentage (%) |
|-----------------------------|---------------------|----------------|-------------------------|----------------|
| Low (I)                     | 33                  | 10.48          | 32.63                   | 8.76           |
| Medium (II)                 | 62                  | 19.68          | 65.53                   | 17.60          |
| High (III)                  | 112                 | 35.56          | 123.55                  | 33.18          |
| Extremely high (IV)         | 108                 | 34.29          | 150.65                  | 40.46          |
| Total                       | 315                 | 100            | 372.36                  | 100            |

568

569

570

**Table 4**

| Pipeline vulnerability | Number of pipelines | Percentage (%) | Area (km <sup>2</sup> ) | Percentage (%) |
|------------------------|---------------------|----------------|-------------------------|----------------|
| Low (I)                | 120                 | 66.66          | 50.417                  | 62.06          |
| Medium (II)            | 37                  | 20.56          | 20.888                  | 25.72          |
| High (III)             | 22                  | 12.22          | 9.833                   | 12.11          |
| Extremely (IV)         | 1                   | 0.56           | 0.087                   | 0.11           |
| Total                  | 180                 | 100            | 81.225                  | 100            |

571

572

573

**Table 5**

| Pipeline risk  | Number of pipelines | Percentage (%) | Area (km <sup>2</sup> ) | Percentage (%) |
|----------------|---------------------|----------------|-------------------------|----------------|
| Low (I)        | 37                  | 20.56          | 14.469                  | 17.81          |
| Medium (II)    | 106                 | 58.89          | 50.757                  | 62.49          |
| High (III)     | 33                  | 18.33          | 13.461                  | 16.57          |
| Extremely (IV) | 4                   | 2.22           | 2.538                   | 3.13           |
| Total          | 180                 | 100            | 81.225                  | 100            |

574

575

Table 6

| Pipeline risk       | Landslides susceptibility                                                                                                                                                                                  | Vulnerability                                                                                                                                            | Risk                                                                                                                                                                                                                        | Control measures                                               |
|---------------------|------------------------------------------------------------------------------------------------------------------------------------------------------------------------------------------------------------|----------------------------------------------------------------------------------------------------------------------------------------------------------|-----------------------------------------------------------------------------------------------------------------------------------------------------------------------------------------------------------------------------|----------------------------------------------------------------|
| Low (I)             | The landslide won't happen under ordinary conditions, but it will occur when strong earthquake, long continuous rain or extremely heavy rain happened.                                                     | The pipes in low risk areas have no any defects and buried very deep. Meanwhile, they are far away from the area affected by landslide.                  | Landslides have no obvious damage to the pipes, and few threats to pipes' safety.                                                                                                                                           | Regular Inspection                                             |
| Medium (II)         | Small landslide mainly occur, and no sign of deformation. But through analyzing geological structure, topography and landform, there is a tendency of landslide.                                           | The pipes in risk areas have almost no faults and buried deep. However, under bad condition, the landslide may also affect the pipes' safety.            | The landslide may make the pipes exposed or deformation.                                                                                                                                                                    | simple monitoring                                              |
| High (III)          | Landslides are most in medium-model and little-model, and they are in deformation, or have obvious deformation recently, such as obvious cracks, subsidence or tympanites on the landslide and even shear. | The pipeline has defects, and buried shallow. Once landslides occurred in the pipeline area, pipes' safety will be threatened                            | The safety of pipeline will be threatened and may suffer from pipe suspension, floating, and damage etc. Therefore it will contribute to a small amount of medium leakage. Fortunately, the pipe can be welded or repaired. | Main monitoring                                                |
| Extremely high (IV) | Large or huge landslide is common in the area with extremely high risk, which is changing or has experienced obvious deformation recently with visible cracks.                                             | The pipelines are subject to dangers at any time as the pipelines within the area prone to landslide have been spotted with many defects or much damage. | There are great threats, for example pipeline rupture or break and may lead to considerable leakage of media or serious deformation even transportation failure.                                                            | Prevention and control measures shall be taken in a short time |

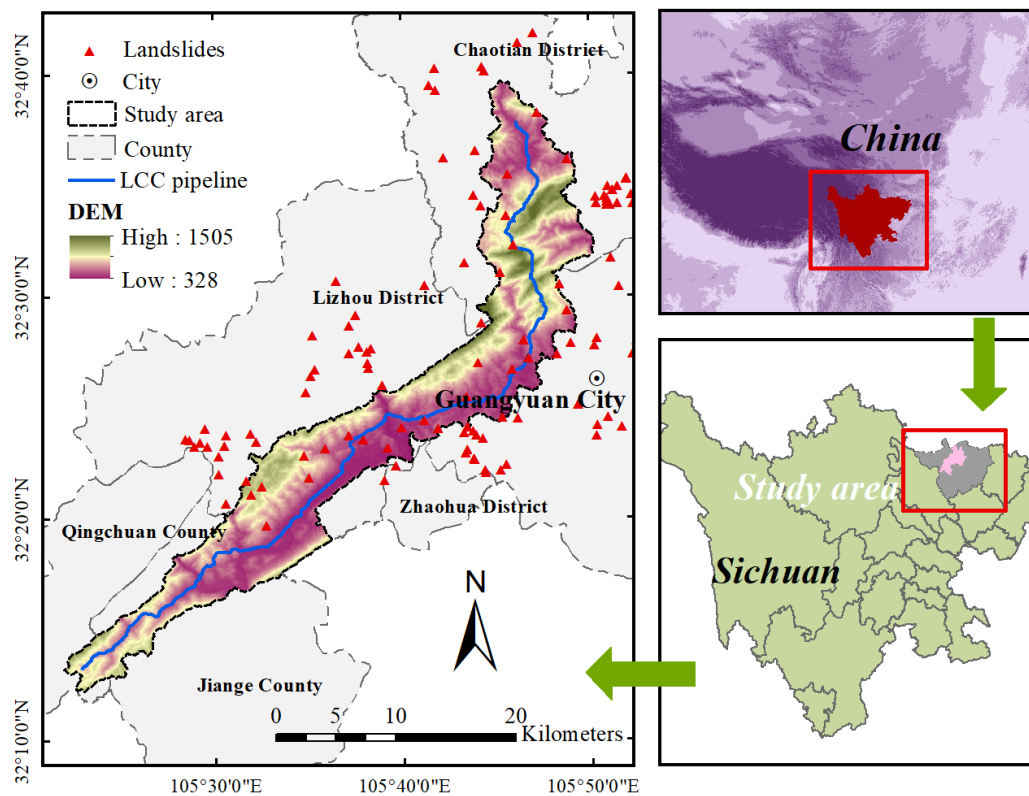

Figure 1

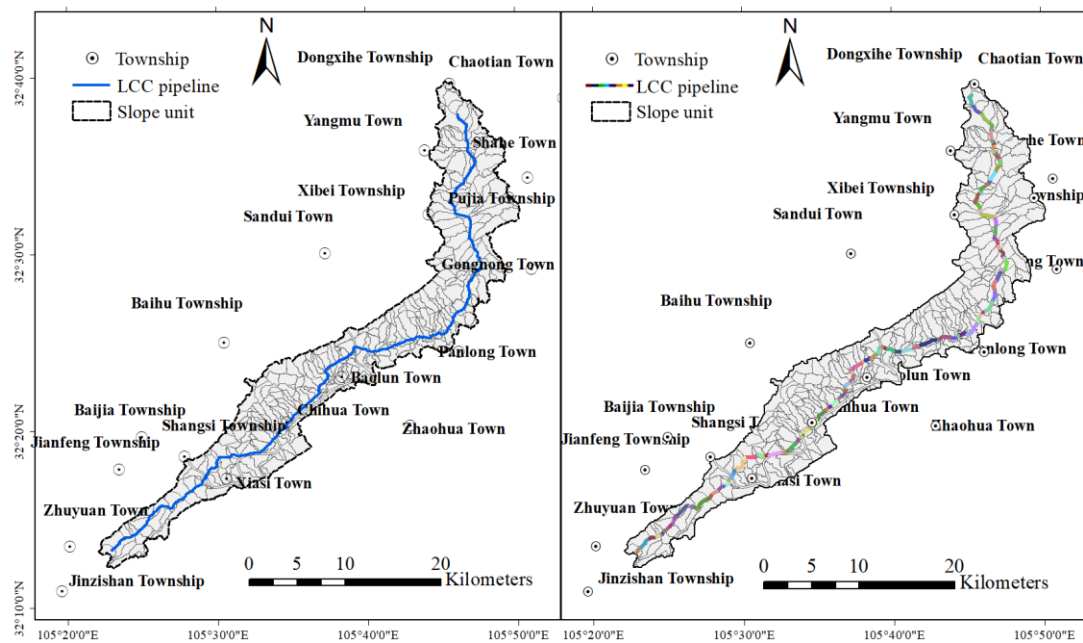

Figure 2



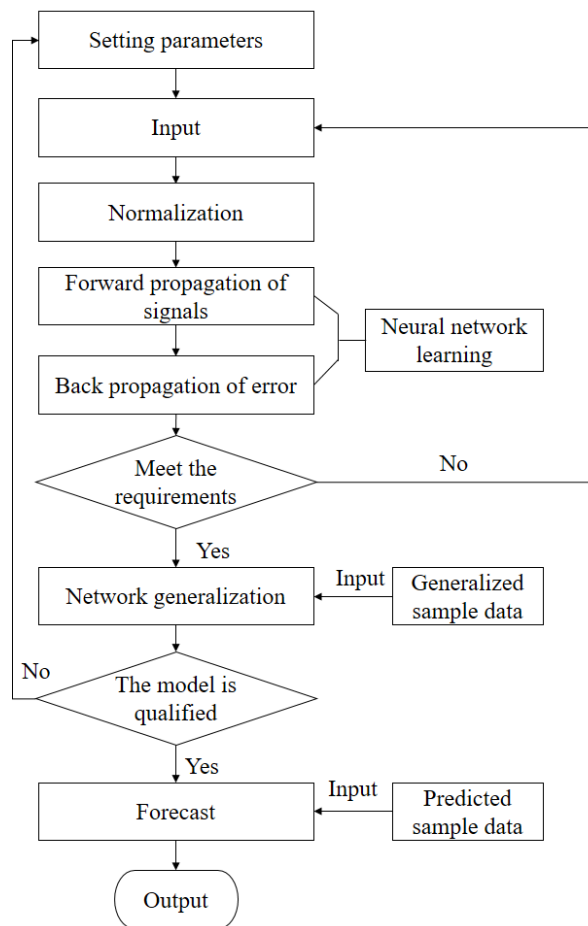

Figure 3

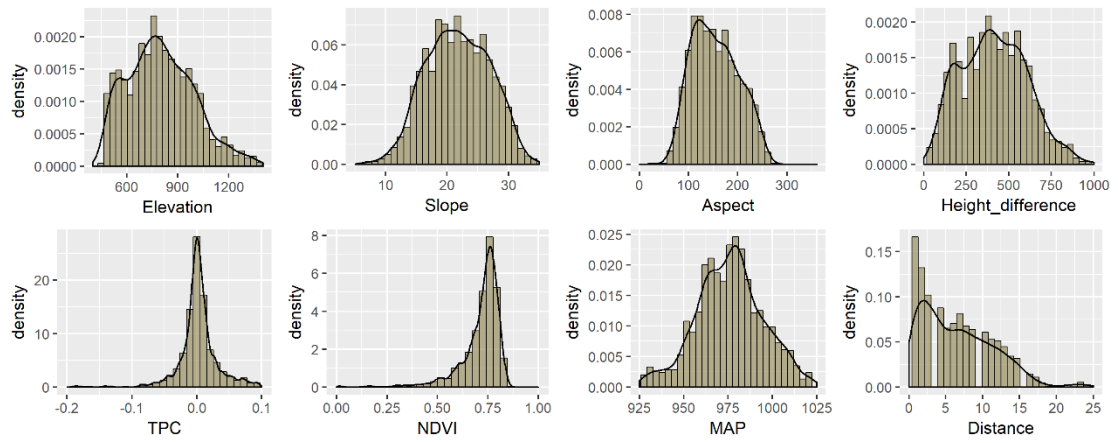

Figure 4

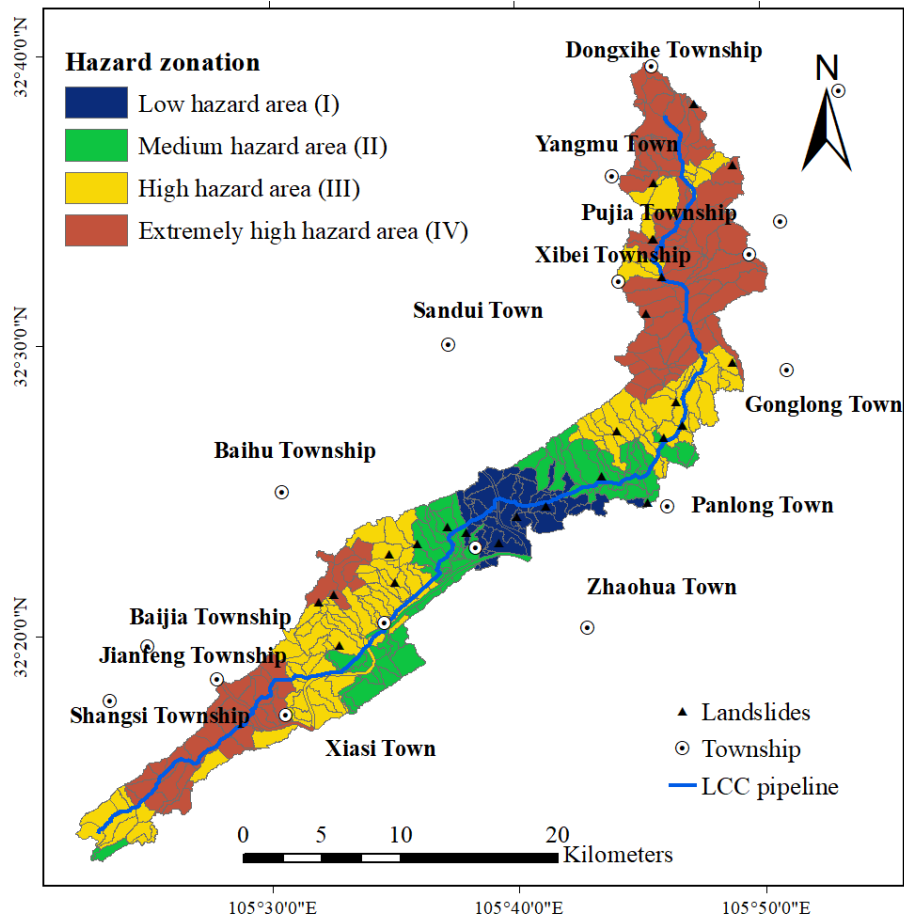

Figure 5

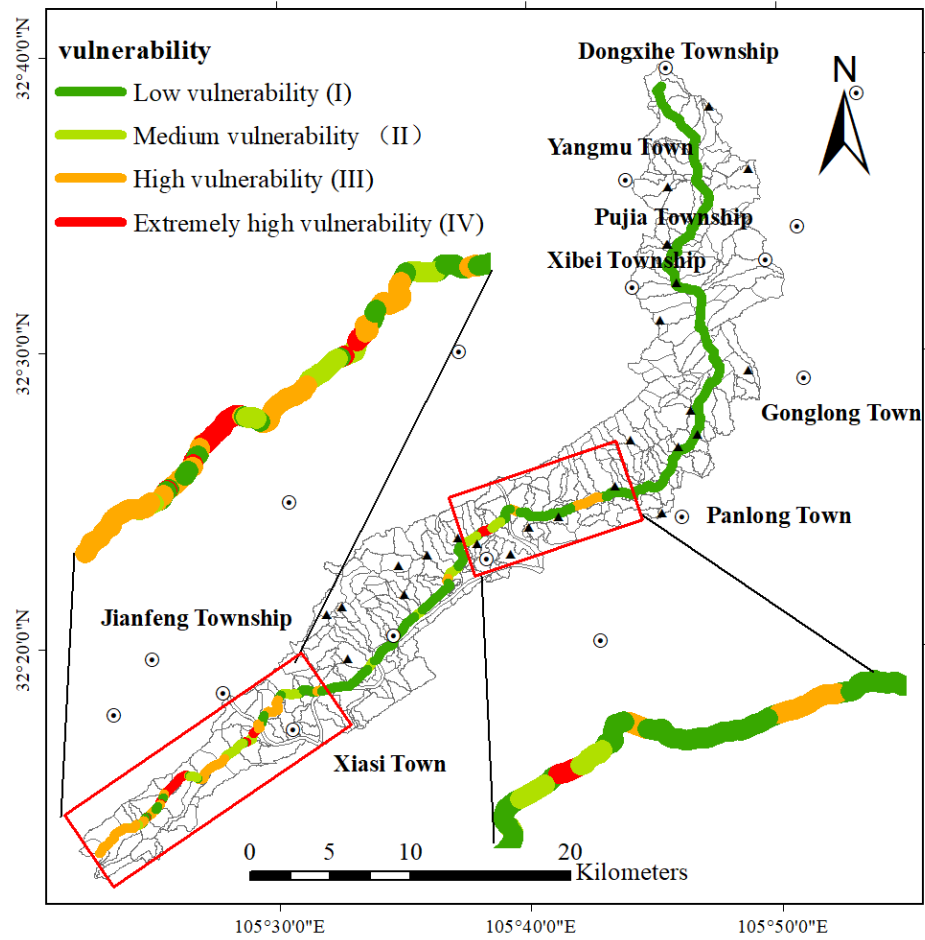

Figure 6

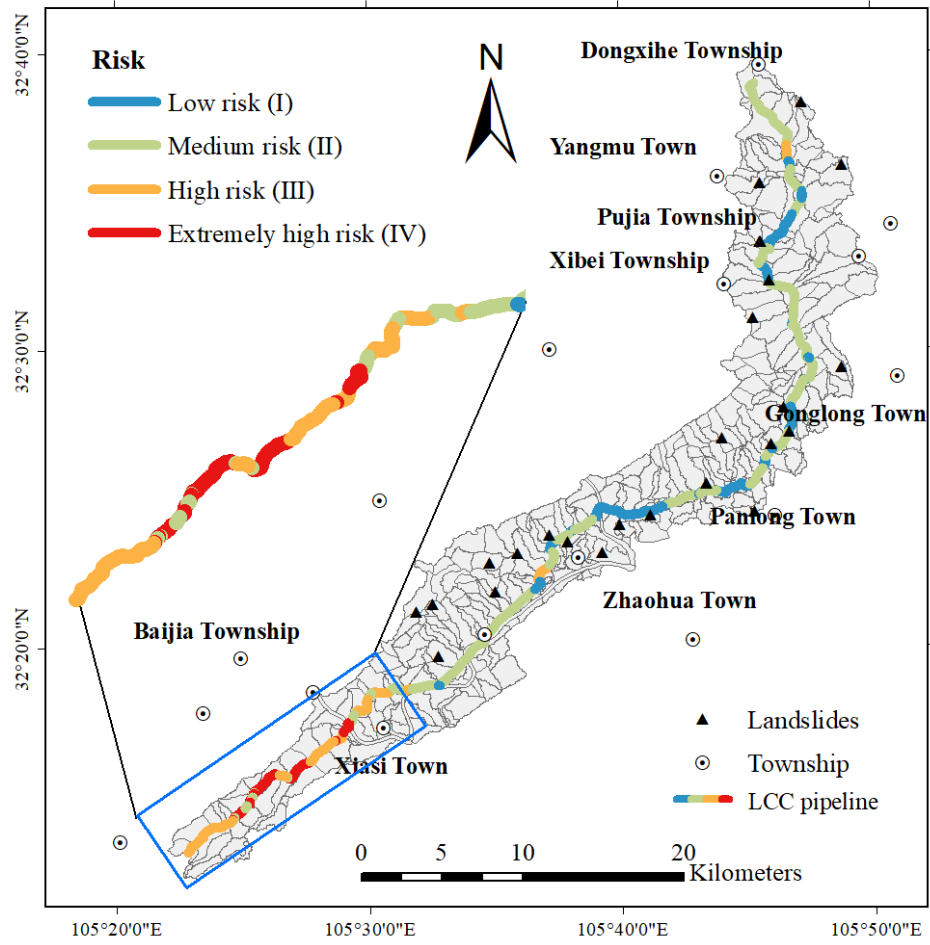

Figure 7

**Appendix 1 Classification of landslide susceptibility grade corresponding to different intervals**

| Factor        | Indicators                    | Interval                               | Susceptibility degree monotonicity | Susceptibility level              |
|---------------|-------------------------------|----------------------------------------|------------------------------------|-----------------------------------|
| Landform      | Elevation                     | [1000 , Highest]                       | Decreasing                         | Low susceptibility(I)             |
|               |                               | [Lowest , 600)                         | Increasing                         | Medium susceptibility(II)         |
|               |                               | [800 , 1000)                           | Decreasing                         | High susceptibility(III)          |
|               |                               | [600 , 700) $\cup$ [700 , 800)         | Increasing, Decreasing             | Extremely high susceptibility(IV) |
|               | Slope                         | [60 , 90)                              | Decreasing                         | Low susceptibility(I)             |
|               |                               | [0 , 15)                               | Increasing                         | Medium susceptibility(II)         |
|               |                               | [30 , 60)                              | Decreasing                         | High susceptibility(III)          |
|               |                               | [15 , 20) $\cup$ [20 , 30)             | Increasing, Decreasing             | Extremely high susceptibility(IV) |
|               | Aspect                        | [0 , 45) $\cup$ [270 , 360)            | Increasing, Decreasing             | Low susceptibility(I)             |
|               |                               | [225 , 270) $\cup$ [45 , 90)           | Decreasing, Increasing             | Medium susceptibility(II)         |
|               |                               | [90 , 135) $\cup$ [180 , 225)          | Increasing, Decreasing             | High susceptibility(III)          |
|               |                               | [135 , 157.5) $\cup$ [157.5 , 180)     | Increasing, Decreasing             | Extremely high susceptibility(IV) |
|               | Height difference             | [Lowest , 100)                         | Increasing                         | Low susceptibility(I)             |
|               |                               | [900 , Highest] $\cup$ [100 , 200)     | Decreasing, Increasing             | Medium susceptibility(II)         |
|               |                               | [600 , 900) $\cup$ [200 , 300)         | Decreasing, Increasing             | High susceptibility(III)          |
|               |                               | [300 , 450) $\cup$ [450 , 600)         | Increasing, Decreasing             | Extremely high susceptibility(IV) |
|               | topographic profile curvature | [Lowest , -0.025)                      | Increasing                         | Low susceptibility(I)             |
|               |                               | [0.025 , Highest]                      | Decreasing                         | Medium susceptibility(II)         |
|               |                               | [-0.025 , -0.01) $\cup$ [0.01 , 0.025) | Increasing, Decreasing             | High susceptibility(III)          |
|               |                               | [-0.01 , 0) $\cup$ [0 , 0.01)          | Increasing, Decreasing             | Extremely high susceptibility(IV) |
| Land cover    | NDVI                          | [-1,0)                                 | Increasing                         | Low susceptibility(I)             |
|               |                               | [0,0.6) $\cup$ [0.9,1]                 | Increasing, Decreasing             | Medium susceptibility(II)         |
|               |                               | [0.6,0.7) $\cup$ [0.8,0.9)             | Increasing, Decreasing             | High susceptibility(III)          |
|               |                               | [0.7,0.75) $\cup$ [0.75,0.8)           | Increasing, Decreasing             | Extremely high susceptibility(IV) |
|               |                               | [1100 , Highest)                       | Decreasing                         | Low susceptibility(I)             |
| Precipitation | Mean annual precipitation     | [Lowest , 960)                         | Increasing                         | Medium susceptibility(II)         |
|               |                               | [990 , 1100)                           | Decreasing                         | High susceptibility(III)          |
|               |                               | [960 ,975) $\cup$ [975 , 990)          | Increasing,                        | Extremely high                    |

|         |                            |               |            |                                      |
|---------|----------------------------|---------------|------------|--------------------------------------|
| Geology | Distance from<br>the fault | [20, Highest] | Decreasing | susceptibility(IV)                   |
|         |                            |               | Decreasing | Low<br>susceptibility(I)             |
|         |                            | [15 , 20)     | Decreasing | Medium<br>susceptibility(II)         |
|         |                            | [5 , 15)      | Decreasing | High<br>susceptibility(III)          |
|         |                            | [0 ,5)        | Decreasing | Extremely high<br>susceptibility(IV) |

Appendix 2 Standard training sample matrix and standard test sample matrix

| Sample type     | ID  | Input  |       |           |      |       |                   |        |          |           | Output |
|-----------------|-----|--------|-------|-----------|------|-------|-------------------|--------|----------|-----------|--------|
|                 |     | Aspect | Slope | Elevation | NDVI | MAP   | Height Difference | TPC    | Distance | Lithology |        |
| Training sample | 1   | 0.2    | 89.9  | 438       | -1   | 908.1 | 33                | -0.582 | 25       | 1         | 0      |
|                 | 50  | 35.2   | 82.8  | 453       | 0    | 912.2 | 79                | -0.456 | 23.47    | 1         | 0.06   |
|                 | 100 | 297.1  | 75.7  | 469       | 0.88 | 916.3 | 115               | -0.33  | 21.9     | 1         | 0.12   |
|                 | 150 | 329.3  | 67.6  | 485       | 0.95 | 920.4 | 167               | -0.168 | 20.34    | 1         | 0.19   |
|                 | 200 | 359.5  | 60    | 499       | 1    | 924.9 | 200               | 0.628  | 18.77    | 1         | 0.25   |
|                 | 250 | 68.4   | 3.8   | 1293      | 0.73 | 930.4 | 1097              | 0.486  | 17.21    | 2         | 0.31   |
|                 | 300 | 89.3   | 8.2   | 1206      | 0.65 | 938   | 1039              | 0.326  | 15.64    | 2         | 0.37   |
|                 | 350 | 246    | 12    | 1102      | 0.56 | 943.6 | 977               | 0.183  | 14.08    | 2         | 0.44   |
|                 | 400 | 269.3  | 15    | 1002      | 0.5  | 949.8 | 902               | -0.142 | 12.52    | 2         | 0.5    |
|                 | 450 | 113.4  | 52.9  | 952       | 0.46 | 960.6 | 848               | -0.018 | 10.95    | 3         | 0.56   |
| Test sample     | 500 | 134.8  | 46.3  | 905       | 0.4  | 972.6 | 757               | -0.012 | 9.39     | 3         | 0.62   |
|                 | 1   | 27.2   | 72.3  | 458       | 0.8  | 911.6 | 59                | -0.544 | 25       | 1         | 0      |
|                 | 2   | 28.5   | 71.6  | 468       | 0.81 | 914.3 | 74                | -0.453 | 23.69    | 1         | 0.06   |
|                 | 3   | 31.5   | 69.5  | 488       | 0.85 | 915.8 | 86                | -0.381 | 22.37    | 1         | 0.11   |
|                 | 4   | 37.8   | 66.2  | 490       | 0.86 | 917.1 | 100               | -0.228 | 21.06    | 1         | 0.16   |
|                 | 5   | 38.6   | 62.1  | 497       | 0.86 | 919.1 | 152               | -0.03  | 19.74    | 1         | 0.22   |
|                 | 6   | 56.1   | 4.4   | 1141      | 0.7  | 934.2 | 939               | 0.439  | 18.43    | 2         | 0.27   |
|                 | 7   | 57.3   | 6.6   | 1240      | 0.68 | 939.6 | 941               | 0.429  | 17.11    | 2         | 0.32   |
|                 | 8   | 65.3   | 9.8   | 1257      | 0.66 | 945.1 | 1124              | 0.413  | 15.79    | 2         | 0.37   |
|                 | 9   | 68.2   | 11    | 1290      | 0.56 | 948.8 | 1135              | 0.318  | 14.48    | 2         | 0.43   |
|                 | 10  | 74.7   | 11.9  | 1382      | 0.53 | 949.9 | 1146              | 0.148  | 13.16    | 2         | 0.48   |
|                 | 11  | 92.4   | 30.4  | 848       | 0.47 | 963.4 | 613               | -0.019 | 11.85    | 3         | 0.53   |
|                 | 12  | 92.7   | 31.8  | 853       | 0.45 | 970.5 | 683               | -0.016 | 10.53    | 3         | 0.58   |
|                 | 13  | 101.9  | 44.7  | 900       | 0.45 | 980.5 | 737               | -0.015 | 9.22     | 3         | 0.64   |



|    |       |      |     |      |        |     |        |      |   |      |
|----|-------|------|-----|------|--------|-----|--------|------|---|------|
| 14 | 110.1 | 50.9 | 917 | 0.35 | 987    | 817 | -0.015 | 7.9  | 3 | 0.69 |
| 15 | 115.6 | 57.5 | 933 | 0.32 | 994.2  | 835 | -0.015 | 6.58 | 3 | 0.74 |
| 16 | 140.6 | 15.6 | 502 | 0.14 | 1001.5 | 245 | 0.019  | 5.27 | 4 | 0.79 |
| 17 | 155.4 | 20   | 626 | 0.14 | 1002.3 | 256 | 0.008  | 3.95 | 4 | 0.85 |
| 18 | 157.1 | 24.8 | 690 | 0.08 | 1010.6 | 293 | 0.007  | 2.64 | 4 | 0.9  |
| 19 | 177.6 | 27.3 | 765 | 0.06 | 1012.7 | 392 | 0.004  | 1.32 | 4 | 0.95 |
| 20 | 178.3 | 29.6 | 795 | 0.04 | 1022.7 | 446 | 0.001  | 0    | 4 | 1    |

608

609

**Appendix 3 Test error of LM-BP neural network**

| Number | Expected value | network output | error   |
|--------|----------------|----------------|---------|
| 1      | 0              | 0.0006         | 0.0006  |
| 2      | 0.06           | 0.0548         | -0.0052 |
| 3      | 0.11           | 0.1113         | 0.0013  |
| 4      | 0.16           | 0.1699         | 0.0099  |
| 5      | 0.22           | 0.2302         | 0.0102  |
| 6      | 0.27           | 0.2614         | -0.0086 |
| 7      | 0.32           | 0.315          | -0.005  |
| 8      | 0.37           | 0.3697         | -0.0003 |
| 9      | 0.43           | 0.4266         | -0.0034 |
| 10     | 0.48           | 0.4899         | 0.0099  |
| 11     | 0.53           | 0.5153         | -0.0147 |
| 12     | 0.58           | 0.5765         | -0.0035 |
| 13     | 0.64           | 0.6405         | 0.0005  |
| 14     | 0.69           | 0.701          | 0.011   |
| 15     | 0.74           | 0.7523         | 0.0123  |
| 16     | 0.79           | 0.8094         | 0.0194  |
| 17     | 0.85           | 0.8616         | 0.0116  |
| 18     | 0.9            | 0.9155         | 0.0155  |
| 19     | 0.95           | 0.9675         | 0.0175  |
| 20     | 1              | 1.0173         | 0.0173  |

612

**Appendix 4 Coordinates of the center line and ancillary facilities of the pipeline**

| Point number         | Previous point | Material | Diameter<br>(mm) | Pressure | Depth<br>(m) | Coordinate |            |         | elevation |
|----------------------|----------------|----------|------------------|----------|--------------|------------|------------|---------|-----------|
|                      |                |          |                  |          |              | X          | Y          | H       |           |
| Marker peg           |                | --       | --               | --       | --           | ..576.265  | ..4357.849 | 503.877 | --        |
| GD1.421              | GD1.420        | Steel    | 168              | high     | 2.2          | ..572.111  | ..4352.109 | 504.235 | 502.035   |
| GD1.422              | GD1.421        | Steel    | 168              | high     | 1.9          | ..571.837  | ..4336.010 | 503.866 | 501.966   |
| GD1.423              | GD1.422        | Steel    | 168              | high     | 2.1          | ..571.538  | ..4319.679 | 503.694 | 501.594   |
| GD1.424              | GD1.423        | Steel    | 168              | high     | 2.1          | ..571.093  | ..4308.825 | 503.510 | 501.410   |
| GD1.425              | GD1.424        | Steel    | 168              | high     | 2.0          | ..570.718  | ..4288.141 | 503.733 | 501.733   |
| Detective pole K566  |                | --       | --               | --       | --           | ..575.536  | ..4284.069 | 503.494 | --        |
| GD1.426              | GD1.425        | Steel    | 168              | high     | 2.3          | ..570.603  | ..4275.147 | 503.998 | 501.698   |
| Mileage peg K566+200 |                | --       | --               | --       | --           | ..574.641  | ..4258.41  | 503.224 | --        |
| GD1.427              | GD1.426        | Steel    | 168              | high     | 2.0          | ..570.222  | ..4258.593 | 503.710 | 501.710   |
| GD1.428              | GD1.427        | Steel    | 168              | high     | 1.6          | ..570.090  | ..4247.642 | 503.283 | 501.683   |
| GD1.429              | GD1.428        | Steel    | 168              | high     | 2.3          | ..569.458  | ..4216.618 | 502.468 | 500.168   |
| GD1.430              | GD1.429        | Steel    | 168              | high     | 2.9          | ..569.043  | ..4208.558 | 504.055 | 501.155   |

613

614

615

616

617

618

619

620

621

622

**Appendix 5 Internal detection data of pipeline**

| FID | Pipe number | distance(m) | Feature type             | Remarks              | Length (mm) | thickness (mm) |
|-----|-------------|-------------|--------------------------|----------------------|-------------|----------------|
| 1   | 10          | 6.408       | Pipe segment             | Spiral weld          | 652         | 11.1           |
| 2   | 20          | 7.060       | Pipe segment             | --                   | 1178        | --             |
| 3   | 20          | 7.648       | Fixed punctuation point  | Valve centerline     | --          | --             |
| 4   | 20          | 7.650       | Valve                    | centerline           | --          | --             |
| 5   | 30          | 8.238       | Pipe segment             | Spiral weld          | 768         | 11.1           |
| 6   | 40          | 9.006       | Pipe segment             | --                   | 2184        | --             |
| 7   | 40          | 10.100      | Globular tee             | centerline           | --          | --             |
| 8   | 50          | 11.190      | Pipe segment             | Spiral weld          | 1700        | 11.1           |
| 9   | 50          | 11.445      | Pit                      | --                   | 548         | 11.1           |
| 10  | 60          | 12.890      | Pipe segment             | Straight weld        | 2342        | 13.6           |
| 11  | 60          | 12.890      | Wall thickness variation | from 11.1mmto 13.6mm | --          | --             |
| 13  | 70          | 15.232      | Pipe segment             | Spiral weld          | 1999        | 11.1           |
| 14  | 70          | 15.232      | Wall thickness variation | from 13.6mmto 11.1mm | --          | --             |
| 15  | 80          | 17.231      | Pipe segment             | Straight weld        | 2352        | 13.4           |
| 16  | 80          | 17.231      | Wall thickness variation | from 11.1mmto 13.4mm | --          | --             |
| 18  | 90          | 19.583      | Pipe segment             | Spiral weld          | 11557       | 11.1           |
| 19  | 90          | 19.583      | Wall thickness variation | from 13.4mmto 11.1mm | --          | --             |
| 20  | 90          | 28.060      | Attachments              | --                   | 598         | 11.1           |
| 21  | 100         | 31.140      | Pipe segment             | --                   | 991         | --             |
| 22  | 100         | 31.580      | Flange                   | centerline           | --          | --             |
| 23  | 110         | 32.131      | Pipe segment             | Spiral weld          | 11660       | 11.1           |
| 24  | 120         | 43.791      | Pipe segment             | Spiral weld          | 5536        | 11.1           |
| 25  | 130         | 49.327      | Pipe segment             | Straight weld        | 2213        | 16.2           |
| 26  | 130         | 49.327      | Wall thickness variation | from 11.1mmto 16.2mm | --          | --             |

624  
625  
626  
627  
628  
629  
630  
631

|    |     |        |                          |                      |      |      |
|----|-----|--------|--------------------------|----------------------|------|------|
| 28 | 140 | 51.540 | Pipe segment             | Spiral weld          | 5608 | 11.1 |
| 29 | 140 | 51.540 | Wall thickness variation | from 16.2mmto 11.1mm | --   | --   |
| 30 | 150 | 57.148 | Pipe segment             | Spiral weld          | 9432 | 11.1 |

## Appendix 6 Core Code of Pipeline Defect Point Coordinate Calculating Program

```
632
633 using System;
634 using System.Collections.Generic;
635 using System.ComponentModel;
636 using System.Data;
637 using System.Drawing;
638 using System.Linq;
639 using System.Text;
640 using System.Threading.Tasks;
641 using System.Windows.Forms;
642 using System.IO;
643 private void button10_Click(object sender, EventArgs e)
644 {
645     double x1 = 0, y1 = 0, z1 = 0, x2 = 0, y2 = 0, z2 = 0, d1 = 0, d2 = 0, h1 = 0, h2 = 0;
646     double l = Convert.ToDouble(textBox9.Text);
647     double f = 0, nl = Convert.ToDouble(textBox7.Text);
648     string[] SplitTxt = textBox2.Text.Split(',');
649     for (long i = 0; i < SplitTxt.Length - 9; i += 5)
650     {
651         d1 = Convert.ToDouble(SplitTxt[i + 1]);
652         x1 = Convert.ToDouble(SplitTxt[i + 2]);
653         y1 = Convert.ToDouble(SplitTxt[i + 3]);
654         z1 = Convert.ToDouble(SplitTxt[i + 4]);
655         d2 = Convert.ToDouble(SplitTxt[i + 6]);
656         x2 = Convert.ToDouble(SplitTxt[i + 7]);
657         y2 = Convert.ToDouble(SplitTxt[i + 8]);
658         z2 = Convert.ToDouble(SplitTxt[i + 9]);
659         h1 = z1 - d1;
660         h2 = z2 - d2;
661         l += Math.Sqrt((x1 - x2) * (x1 - x2) + (y1 - y2) * (y1 - y2) + (h1 - h2) * (h1 - h2));
662     }
663     textBox8.Text = l.ToString();
664     f = (nl - l) / nl;
665     ff = f;
666     textBox5.Text = Convert.ToDouble(f).ToString("P");
667 }
668 private void button9_Click(object sender, EventArgs e)
669 {
670     double f1 = ff;
671     double l1 = 0;
672     string zb = ""; string[] SplitTxt = textBox3.Text.Split(',');
673     for (long i = 0; i < SplitTxt.Length - 1; i += 2)
674     {
675         l1 = Convert.ToDouble(SplitTxt[i + 1]);
```

```

676         l1 += (-ff) * l1;
677         double x1 = 0, y1 = 0, z1 = 0, x2 = 0, y2 = 0, z2 = 0, d1 = 0, d2 = 0, h1 = 0, h2 = 0, l0=0,l2=0;
678         double l = Convert.ToDouble(textBox9.Text);
679         double x = 0, y = 0, h = 0;
680         string[] SplitTxt1 = textBox2.Text.Split(',');
681         for (long j = 0; j < SplitTxt1.Length - 9; j += 5)
682         {
683             d1 = Convert.ToDouble(SplitTxt1[j + 1]);
684             x1 = Convert.ToDouble(SplitTxt1[j + 2]);
685             y1 = Convert.ToDouble(SplitTxt1[j + 3]);
686             z1 = Convert.ToDouble(SplitTxt1[j + 4]);
687             d2 = Convert.ToDouble(SplitTxt1[j + 6]);
688             x2 = Convert.ToDouble(SplitTxt1[j + 7]);
689             y2 = Convert.ToDouble(SplitTxt1[j + 8]);
690             z2 = Convert.ToDouble(SplitTxt1[j + 9]);
691             h1 = z1 - d1; h2 = z2 - d2;
692             l0= Math.Sqrt((x1 - x2) * (x1 - x2) + (y1 - y2) * (y1 - y2) + (h1 - h2) * (h1 - h2));
693             l = l + l0;
694             if (l - l1 < 0)
695             {
696                 ;
697             }
698             else if (l - l1 > 0)
699             {
700                 l2 = l0 - (l - l1);
701                 x = x1 + (x2 - x1) * l2 / l0;
702                 y = y1 + (y2 - y1) * l2 / l0;
703                 h = h1 + (h2 - h1) * l2 / l0;
704                 string xx, yy, hh, v;
705                 v = SplitTxt[i];
706                 xx = Convert.ToDouble(x).ToString();
707                 yy = Convert.ToDouble(y).ToString();
708                 hh = Convert.ToDouble(h).ToString();
709                 zb += v + ", " + xx + ", " + yy + ", " + hh + ",\n";
710                 break;
711             }
712         }
713     }
714     textBox6.Text = zb;
715 }

```

## Appendix 7 Pipeline Landslide Risk Assessment Results

| Fid | Start    | Terminus | Susceptibility | Susceptibility level | Vulnerability | Vulnerability level | Risk  | Risk level |
|-----|----------|----------|----------------|----------------------|---------------|---------------------|-------|------------|
| 1   | K558     | K559+446 | 0.874          | IV                   | 0.168         | I                   | 0.147 | II         |
| 2   | K559+446 | K563+718 | 0.874          | IV                   | 0.178         | I                   | 0.156 | II         |
| 3   | K563+718 | K564+883 | 0.932          | IV                   | 0.143         | I                   | 0.133 | II         |
| 4   | K564+883 | K566+90  | 0.943          | IV                   | 0.149         | I                   | 0.141 | II         |
| 5   | K566+90  | K567+117 | 0.943          | IV                   | 0.280         | II                  | 0.264 | III        |
| 6   | K567+117 | K567+224 | 0.766          | IV                   | 0.095         | I                   | 0.073 | I          |
| 7   | K567+224 | K567+384 | 0.729          | III                  | 0.117         | I                   | 0.085 | II         |
| 8   | K567+384 | K567+674 | 0.729          | III                  | 0.079         | I                   | 0.058 | I          |
| 9   | K567+674 | K567+782 | 0.729          | III                  | 0.141         | I                   | 0.103 | II         |
| 10  | K567+782 | K567+846 | 0.729          | III                  | 0.066         | I                   | 0.048 | I          |
| 11  | K567+846 | K567+904 | 0.729          | III                  | 0.097         | I                   | 0.071 | I          |
| 12  | K568+904 | K568+197 | 0.722          | III                  | 0.154         | I                   | 0.111 | II         |
| 13  | K568+197 | K568+430 | 0.763          | IV                   | 0.144         | I                   | 0.110 | II         |
| 14  | K569+430 | K569+419 | 0.739          | III                  | 0.186         | I                   | 0.137 | II         |
| 15  | K569+419 | K569+443 | 0.739          | III                  | 0.141         | I                   | 0.104 | II         |
| 16  | K569+443 | K569+467 | 0.739          | III                  | 0.107         | I                   | 0.079 | II         |
| 17  | K569+467 | K569+578 | 0.739          | III                  | 0.121         | I                   | 0.089 | II         |
| 18  | K569+578 | K569+920 | 0.739          | III                  | 0.107         | I                   | 0.079 | II         |
| 19  | K571+920 | K571+123 | 0.736          | III                  | 0.127         | I                   | 0.093 | II         |
| 20  | K571+123 | K571+982 | 0.799          | IV                   | 0.109         | I                   | 0.087 | II         |
| 21  | K572+982 | K572+729 | 0.753          | IV                   | 0.090         | I                   | 0.068 | I          |
| 22  | K573+729 | K573+548 | 0.802          | IV                   | 0.094         | I                   | 0.075 | I          |
| 23  | K574+548 | K574+249 | 0.805          | IV                   | 0.084         | I                   | 0.068 | I          |
| 24  | K574+249 | K574+525 | 0.805          | IV                   | 0.150         | I                   | 0.121 | II         |
| 25  | K575+525 | K575+538 | 0.805          | IV                   | 0.115         | I                   | 0.093 | II         |
| 26  | K575+538 | K575+600 | 0.805          | IV                   | 0.157         | I                   | 0.126 | II         |
| 27  | K576+600 | K576+737 | 0.816          | IV                   | 0.108         | I                   | 0.088 | II         |
| 28  | K577+737 | K577+120 | 0.889          | IV                   | 0.089         | I                   | 0.079 | I          |
| 29  | K577+120 | K577+146 | 0.889          | IV                   | 0.094         | I                   | 0.084 | I          |
| 30  | K577+146 | K577+187 | 0.889          | IV                   | 0.169         | I                   | 0.150 | II         |
| 31  | K578+187 | K578+571 | 0.889          | IV                   | 0.118         | I                   | 0.105 | II         |
| 32  | K578+571 | K578+608 | 0.889          | IV                   | 0.095         | I                   | 0.084 | I          |
| 33  | K579+608 | K579+624 | 0.853          | IV                   | 0.133         | I                   | 0.113 | II         |
| 34  | K580+624 | K580+582 | 0.871          | IV                   | 0.156         | I                   | 0.136 | II         |
| 35  | K581+582 | K581+43  | 0.871          | IV                   | 0.097         | I                   | 0.084 | I          |
| 36  | K581+43  | K581+273 | 0.871          | IV                   | 0.143         | I                   | 0.125 | II         |
| 37  | K581+273 | K581+536 | 0.880          | IV                   | 0.125         | I                   | 0.110 | II         |
| 38  | K581+536 | K581+659 | 0.872          | IV                   | 0.154         | I                   | 0.134 | II         |
| 39  | K582+659 | K582+263 | 0.830          | IV                   | 0.152         | I                   | 0.126 | II         |
| 40  | K582+263 | K582+437 | 0.830          | IV                   | 0.116         | I                   | 0.096 | II         |
| 41  | K583+437 | K583+512 | 0.830          | IV                   | 0.152         | I                   | 0.126 | II         |
| 42  | K583+512 | K583+693 | 0.798          | IV                   | 0.105         | I                   | 0.084 | II         |
| 43  | K583+693 | K583+720 | 0.740          | III                  | 0.113         | I                   | 0.084 | II         |
| 44  | K585+720 | K585+55  | 0.740          | III                  | 0.178         | I                   | 0.132 | II         |
| 45  | K585+55  | K585+101 | 0.668          | III                  | 0.196         | I                   | 0.131 | II         |
| 46  | K585+101 | K585+370 | 0.668          | III                  | 0.178         | I                   | 0.119 | II         |
| 47  | K585+370 | K585+634 | 0.696          | III                  | 0.190         | I                   | 0.132 | II         |
| 48  | K585+634 | K585+734 | 0.668          | III                  | 0.116         | I                   | 0.077 | II         |



|    |          |          |       |     |       |     |          |
|----|----------|----------|-------|-----|-------|-----|----------|
| 49 | K585+734 | K585+908 | 0.627 | III | 0.198 | I   | 0.124 II |
| 50 | K585+908 | K585+949 | 0.627 | III | 0.168 | I   | 0.105 II |
| 51 | K586+949 | K586+782 | 0.627 | III | 0.173 | I   | 0.108 II |
| 52 | K586+782 | K586+805 | 0.627 | III | 0.117 | I   | 0.073 II |
| 53 | K587+805 | K587+364 | 0.627 | III | 0.171 | I   | 0.107 II |
| 54 | K587+364 | K587+498 | 0.618 | III | 0.078 | I   | 0.048 I  |
| 55 | K587+498 | K587+794 | 0.618 | III | 0.107 | I   | 0.066 I  |
| 56 | K589+794 | K589+251 | 0.618 | III | 0.102 | I   | 0.063 I  |
| 57 | K590+251 | K590+757 | 0.618 | III | 0.172 | I   | 0.106 II |
| 58 | K590+757 | K590+780 | 0.556 | III | 0.153 | I   | 0.085 II |
| 59 | K590+780 | K590+812 | 0.556 | III | 0.123 | I   | 0.068 II |
| 60 | K591+812 | K591+500 | 0.555 | III | 0.135 | I   | 0.075 II |
| 61 | K591+500 | K591+946 | 0.555 | III | 0.087 | I   | 0.048 I  |
| 62 | K592+946 | K592+259 | 0.555 | III | 0.107 | I   | 0.059 I  |
| 63 | K593+259 | K593+631 | 0.517 | III | 0.152 | I   | 0.079 II |
| 64 | K593+631 | K593+912 | 0.374 | II  | 0.153 | I   | 0.057 II |
| 65 | K594+912 | K594+993 | 0.374 | II  | 0.150 | I   | 0.056 II |
| 66 | K595+993 | K595+203 | 0.374 | II  | 0.076 | I   | 0.028 I  |
| 67 | K595+203 | K595+261 | 0.359 | II  | 0.114 | I   | 0.041 I  |
| 68 | K595+261 | K595+383 | 0.359 | II  | 0.099 | I   | 0.036 I  |
| 69 | K596+383 | K596+383 | 0.412 | II  | 0.278 | II  | 0.115 II |
| 70 | K596+383 | K596+429 | 0.412 | II  | 0.107 | I   | 0.044 I  |
| 71 | K597+429 | K597+62  | 0.359 | II  | 0.121 | I   | 0.043 I  |
| 72 | K597+62  | K597+200 | 0.412 | II  | 0.158 | I   | 0.065 II |
| 73 | K597+200 | K597+345 | 0.412 | II  | 0.133 | I   | 0.055 I  |
| 74 | K597+345 | K597+680 | 0.412 | II  | 0.273 | II  | 0.112 II |
| 75 | K599+680 | K599+376 | 0.321 | II  | 0.461 | II  | 0.148 II |
| 76 | K599+376 | K599+693 | 0.211 | I   | 0.105 | I   | 0.022 I  |
| 77 | K600+693 | K600+188 | 0.211 | I   | 0.179 | I   | 0.038 I  |
| 78 | K600+188 | K600+353 | 0.106 | I   | 0.172 | I   | 0.018 I  |
| 79 | K601+353 | K601+369 | 0.106 | I   | 0.264 | II  | 0.028 I  |
| 80 | K602+369 | K602+495 | 0.099 | I   | 0.190 | I   | 0.019 I  |
| 81 | K603+495 | K603+131 | 0.067 | I   | 0.436 | II  | 0.029 I  |
| 82 | K603+131 | K603+551 | 0.099 | I   | 0.144 | I   | 0.014 I  |
| 83 | K604+551 | K604+321 | 0.104 | I   | 0.253 | II  | 0.026 I  |
| 84 | K604+321 | K604+976 | 0.099 | I   | 0.102 | I   | 0.010 I  |
| 85 | K605+976 | K605+735 | 0.178 | I   | 0.372 | II  | 0.066 II |
| 86 | K606+735 | K606+368 | 0.236 | I   | 0.637 | III | 0.150 II |
| 87 | K606+368 | K606+838 | 0.236 | I   | 0.127 | I   | 0.030 I  |
| 88 | K607+838 | K607+596 | 0.323 | II  | 0.407 | II  | 0.131 II |
| 89 | K608+596 | K608+20  | 0.323 | II  | 0.163 | I   | 0.053 II |
| 90 | K608+20  | K608+287 | 0.323 | II  | 0.145 | I   | 0.047 I  |
| 91 | K608+287 | K608+546 | 0.346 | II  | 0.084 | I   | 0.029 I  |
| 92 | K608+546 | K608+583 | 0.406 | II  | 0.215 | I   | 0.087 II |
| 93 | K608+583 | K608+835 | 0.406 | II  | 0.291 | II  | 0.118 II |
| 94 | K609+835 | K609+565 | 0.442 | II  | 0.279 | II  | 0.123 II |
| 95 | K610+565 | K610+564 | 0.442 | II  | 0.403 | II  | 0.178 II |
| 96 | K610+564 | K610+945 | 0.442 | II  | 0.453 | II  | 0.200 II |
| 97 | K611+945 | K611+89  | 0.482 | II  | 0.117 | I   | 0.056 I  |
| 98 | K611+89  | K611+691 | 0.501 | III | 0.138 | I   | 0.069 II |
| 99 | K612+691 | K612+413 | 0.501 | III | 0.175 | I   | 0.088 II |

|     |          |          |       |     |       |     |           |
|-----|----------|----------|-------|-----|-------|-----|-----------|
| 100 | K613+413 | K613+269 | 0.501 | III | 0.163 | I   | 0.082 II  |
| 101 | K613+269 | K613+442 | 0.502 | III | 0.166 | I   | 0.083 II  |
| 102 | K614+442 | K614+83  | 0.502 | III | 0.354 | II  | 0.178 II  |
| 103 | K614+83  | K614+980 | 0.502 | III | 0.263 | II  | 0.132 II  |
| 104 | K615+980 | K615+218 | 0.601 | III | 0.153 | I   | 0.092 II  |
| 105 | K615+218 | K615+388 | 0.601 | III | 0.143 | I   | 0.086 II  |
| 106 | K616+388 | K616+87  | 0.635 | III | 0.126 | I   | 0.080 II  |
| 107 | K616+87  | K616+300 | 0.556 | III | 0.144 | I   | 0.080 II  |
| 108 | K616+300 | K616+460 | 0.505 | III | 0.269 | II  | 0.136 II  |
| 109 | K617+460 | K617+715 | 0.505 | III | 0.172 | I   | 0.087 II  |
| 110 | K617+715 | K617+827 | 0.505 | III | 0.255 | II  | 0.129 II  |
| 111 | K618+827 | K618+28  | 0.556 | III | 0.170 | I   | 0.095 II  |
| 112 | K618+28  | K618+687 | 0.556 | III | 0.313 | II  | 0.174 II  |
| 113 | K620+687 | K620+78  | 0.556 | III | 0.188 | I   | 0.105 II  |
| 114 | K620+78  | K620+298 | 0.425 | II  | 0.196 | I   | 0.083 II  |
| 115 | K621+298 | K621+509 | 0.576 | III | 0.223 | I   | 0.128 II  |
| 116 | K621+509 | K621+611 | 0.425 | II  | 0.107 | I   | 0.045 I   |
| 117 | K622+611 | K622+10  | 0.425 | II  | 0.262 | II  | 0.111 II  |
| 118 | K622+10  | K622+86  | 0.425 | II  | 0.122 | I   | 0.052 I   |
| 119 | K622+86  | K622+539 | 0.693 | III | 0.178 | I   | 0.123 II  |
| 120 | K622+539 | K622+897 | 0.634 | III | 0.549 | III | 0.348 III |
| 121 | K623+897 | K623+36  | 0.634 | III | 0.535 | III | 0.339 III |
| 122 | K623+36  | K623+794 | 0.693 | III | 0.145 | I   | 0.100 II  |
| 123 | K624+794 | K624+866 | 0.693 | III | 0.310 | II  | 0.215 II  |
| 124 | K625+866 | K625+242 | 0.796 | IV  | 0.137 | I   | 0.109 II  |
| 125 | K627+242 | K627+60  | 0.859 | IV  | 0.452 | II  | 0.388 III |
| 126 | K627+60  | K627+162 | 0.859 | IV  | 0.193 | I   | 0.166 II  |
| 127 | K627+162 | K627+313 | 0.859 | IV  | 0.166 | I   | 0.143 II  |
| 128 | K627+313 | K627+700 | 0.783 | IV  | 0.167 | I   | 0.131 II  |
| 129 | K628+700 | K628+146 | 0.908 | IV  | 0.501 | III | 0.455 III |
| 130 | K628+146 | K628+196 | 0.908 | IV  | 0.139 | I   | 0.126 II  |
| 131 | K628+196 | K628+610 | 0.908 | IV  | 0.631 | III | 0.573 IV  |
| 132 | K629+610 | K629+355 | 0.787 | IV  | 0.369 | II  | 0.290 III |
| 133 | K629+355 | K629+525 | 0.787 | IV  | 0.729 | III | 0.574 IV  |
| 134 | K629+525 | K629+570 | 0.787 | IV  | 0.252 | II  | 0.198 II  |
| 135 | K629+570 | K629+620 | 0.787 | IV  | 0.465 | II  | 0.366 III |
| 136 | K630+620 | K630+348 | 0.787 | IV  | 0.286 | II  | 0.225 II  |
| 137 | K630+348 | K630+956 | 0.892 | IV  | 0.389 | II  | 0.347 III |
| 138 | K631+956 | K631+116 | 0.886 | IV  | 0.423 | II  | 0.375 III |
| 139 | K631+116 | K631+528 | 0.805 | IV  | 0.513 | III | 0.413 III |
| 140 | K633+528 | K633+435 | 0.805 | IV  | 0.568 | III | 0.457 III |
| 141 | K635+435 | K635+302 | 0.933 | IV  | 0.625 | III | 0.583 IV  |
| 142 | K635+302 | K635+326 | 0.884 | IV  | 0.611 | III | 0.540 III |
| 143 | K635+326 | K635+359 | 0.884 | IV  | 0.441 | II  | 0.390 III |
| 144 | K635+359 | K635+368 | 0.884 | IV  | 0.194 | I   | 0.171 II  |
| 145 | K635+368 | K635+530 | 0.884 | IV  | 0.374 | II  | 0.331 III |
| 146 | K635+530 | K635+604 | 0.884 | IV  | 0.307 | II  | 0.271 III |
| 147 | K635+604 | K635+850 | 0.805 | IV  | 0.377 | II  | 0.303 III |
| 148 | K635+850 | K635+943 | 0.805 | IV  | 0.234 | I   | 0.188 II  |
| 149 | K635+943 | K635+972 | 0.805 | IV  | 0.139 | I   | 0.112 II  |
| 150 | K635+972 | K635+974 | 0.805 | IV  | 0.121 | I   | 0.097 II  |

|     |          |          |       |     |       |     |           |
|-----|----------|----------|-------|-----|-------|-----|-----------|
| 151 | K635+974 | K635+990 | 0.805 | IV  | 0.138 | I   | 0.111 II  |
| 152 | K636+990 | K636+152 | 0.933 | IV  | 0.598 | III | 0.558 III |
| 153 | K636+152 | K636+159 | 0.933 | IV  | 0.157 | I   | 0.146 II  |
| 154 | K636+159 | K636+320 | 0.884 | IV  | 0.579 | III | 0.512 III |
| 155 | K636+320 | K636+427 | 0.884 | IV  | 0.166 | I   | 0.147 II  |
| 156 | K636+427 | K636+517 | 0.884 | IV  | 0.124 | I   | 0.110 II  |
| 157 | K636+517 | K636+806 | 0.834 | IV  | 0.663 | III | 0.553 III |
| 158 | K636+806 | K636+893 | 0.834 | IV  | 0.794 | IV  | 0.662 IV  |
| 159 | K637+893 | K637+57  | 0.834 | IV  | 0.519 | III | 0.433 III |
| 160 | K637+57  | K637+109 | 0.834 | IV  | 0.542 | III | 0.452 III |
| 161 | K637+109 | K637+181 | 0.834 | IV  | 0.111 | I   | 0.093 II  |
| 162 | K637+181 | K637+332 | 0.834 | IV  | 0.127 | I   | 0.106 II  |
| 163 | K638+332 | K638+87  | 0.834 | IV  | 0.608 | III | 0.507 III |
| 164 | K638+87  | K638+140 | 0.834 | IV  | 0.157 | I   | 0.131 II  |
| 165 | K638+140 | K638+193 | 0.767 | IV  | 0.682 | III | 0.523 III |
| 166 | K638+193 | K638+199 | 0.767 | IV  | 0.188 | I   | 0.144 II  |
| 167 | K638+199 | K638+226 | 0.767 | IV  | 0.126 | I   | 0.097 II  |
| 168 | K638+226 | K638+368 | 0.767 | IV  | 0.532 | III | 0.408 III |
| 169 | K638+368 | K638+409 | 0.767 | IV  | 0.604 | III | 0.463 III |
| 170 | K638+409 | K638+432 | 0.767 | IV  | 0.205 | I   | 0.157 II  |
| 171 | K638+432 | K638+444 | 0.767 | IV  | 0.525 | III | 0.403 III |
| 172 | K638+444 | K638+676 | 0.767 | IV  | 0.173 | I   | 0.133 II  |
| 173 | K638+676 | K638+837 | 0.767 | IV  | 0.479 | II  | 0.367 III |
| 174 | K639+837 | K639+266 | 0.744 | III | 0.483 | II  | 0.359 III |
| 175 | K639+266 | K639+339 | 0.744 | III | 0.427 | II  | 0.318 III |
| 176 | K639+339 | K639+435 | 0.744 | III | 0.549 | III | 0.408 III |
| 177 | K639+435 | K639+562 | 0.631 | III | 0.324 | II  | 0.204 II  |
| 178 | K640+562 | K640+63  | 0.607 | III | 0.476 | II  | 0.289 III |
| 179 | K641+63  | K641+600 | 0.607 | III | 0.604 | III | 0.367 III |
| 180 | K642+600 | K642+225 | 0.607 | III | 0.461 | II  | 0.280 III |

717

718

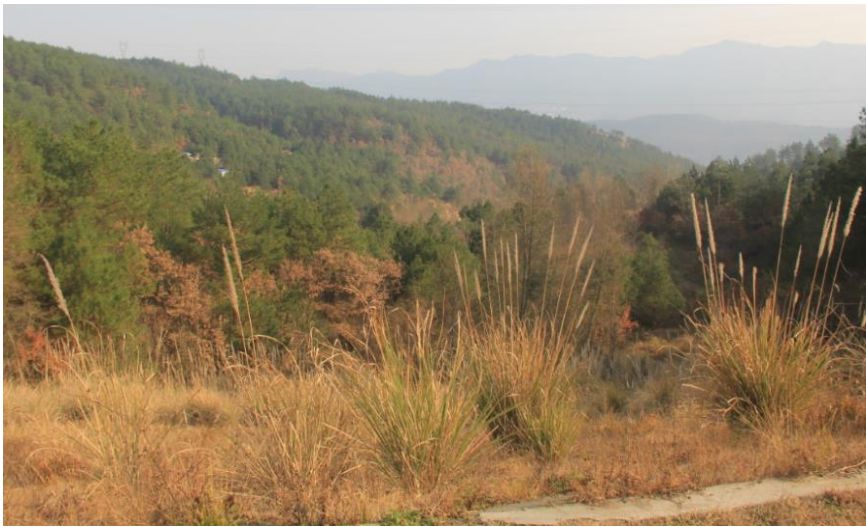

720

721

Figure 1 Vegetation distribution in a watershed of the study area

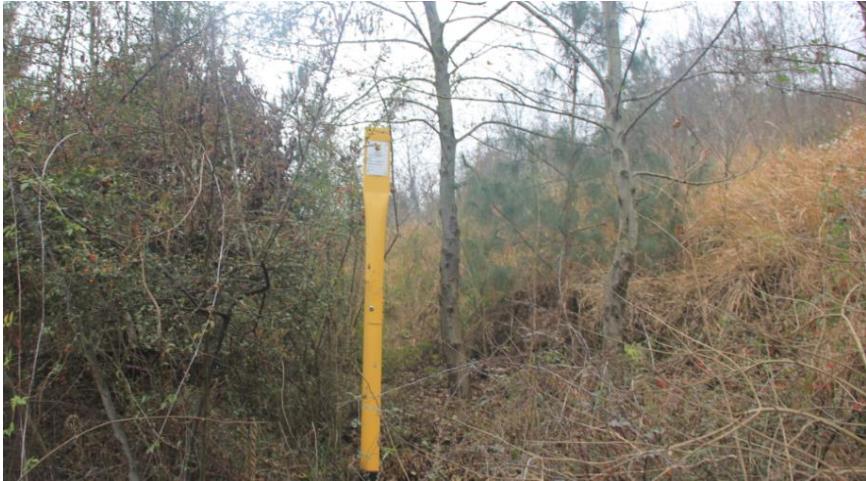

722

723

Figure 2 Vegetation environment of a pipeline section in the study area

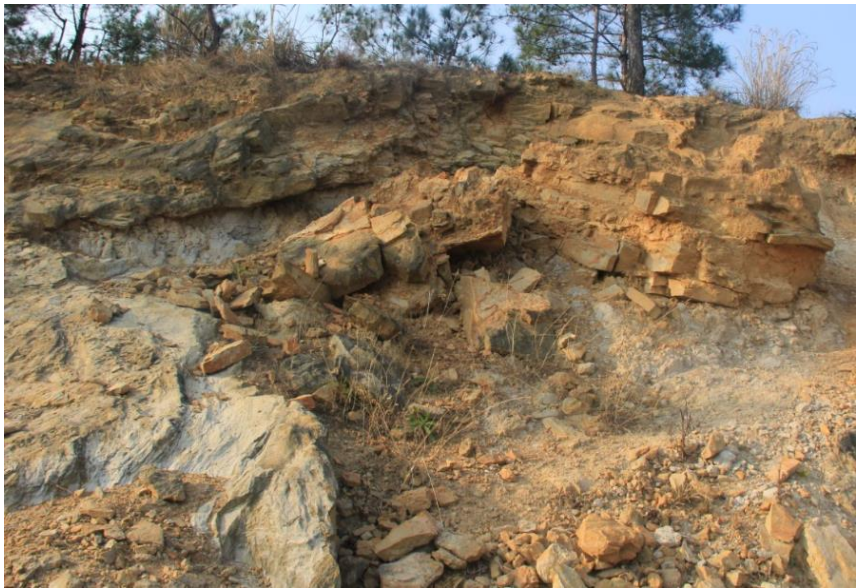

724

725

Figure 3 Outcropping of rock strata in the study area
